# Supplementary material for: Rapid synthesis of hydrogen bond templated handcuff rotaxanes
Source: Royal Society of Chemistry journal article supplement (doi:10.1039/d4ob00672k), 2024-01-01
Supplement: d4ob00672k1.pdf [file d4ob00672k1.pdf]

## Electronic Supplementary Information

### Rapid Synthesis of Hydrogen Bond Templated Handcuff Rotaxanes

Sean R. Barlow, David Tomkinson, Nathan R. Halcovitch and Nicholas H. Evans\*

Department of Chemistry, Lancaster University, Lancaster, LA1 4YB, UK.

|                                                                                   |     |
|-----------------------------------------------------------------------------------|-----|
| Part 1: Further details on attempted synthesis of bis-macrocycle <b>BM1</b> ..... | S2  |
| Part 2: Spectral data .....                                                       | S3  |
| Part 3: Crystallographic data .....                                               | S24 |
| Part 4: References.....                                                           | S26 |

## Part 1: Further details on attempted synthesis of bis-macrocycle **BM1**

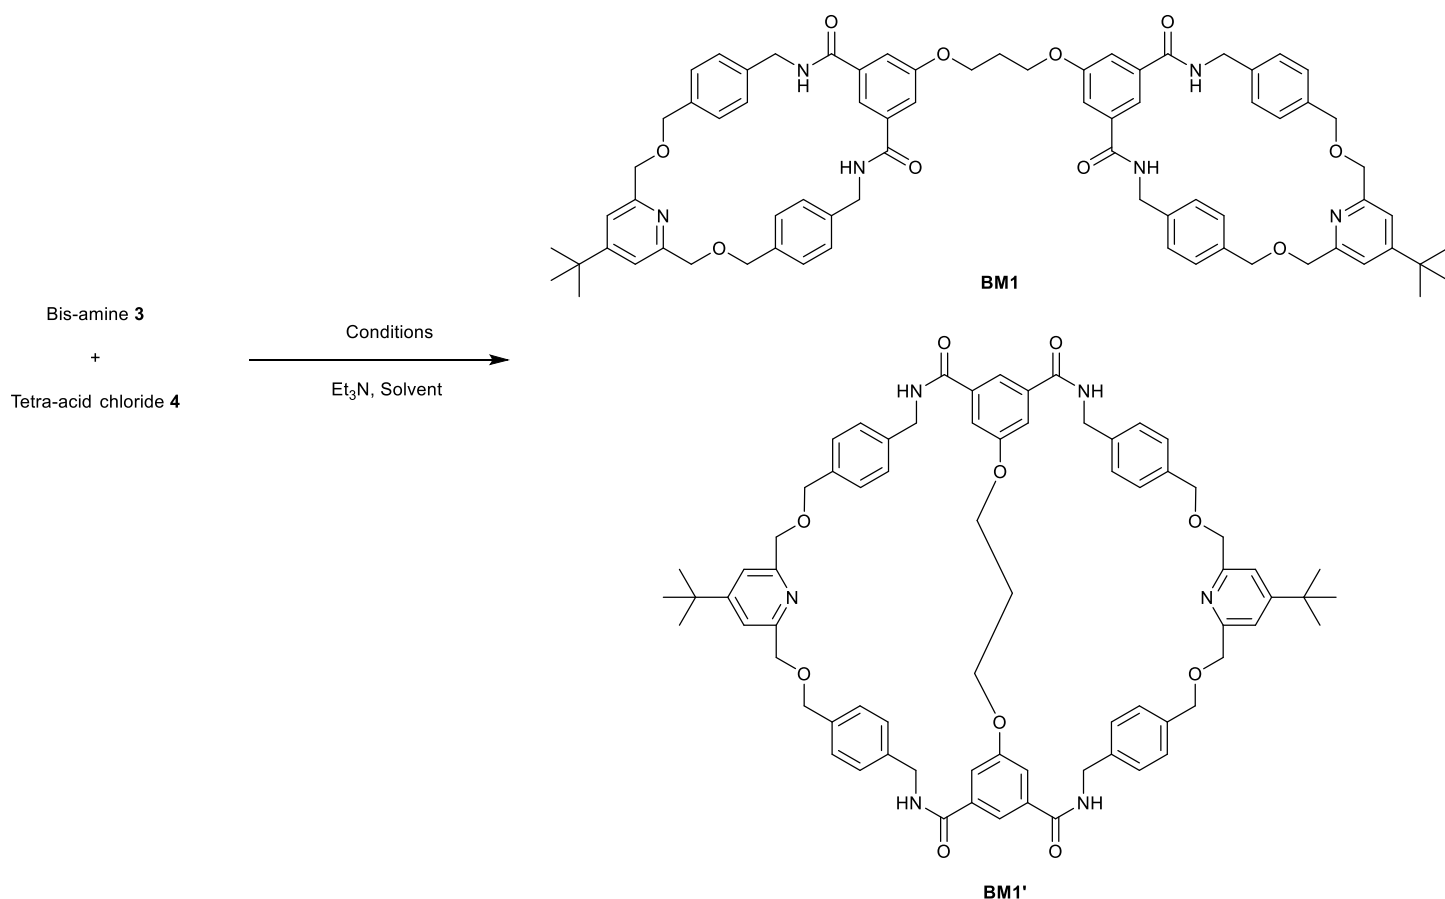

| Attempt | Solvent                         | Template    | High <sup>a</sup> / Semi-high <sup>b</sup> dilution | (%) Yield <b>BM1</b> | (%) Yield <b>BM1'</b> |
|---------|---------------------------------|-------------|-----------------------------------------------------|----------------------|-----------------------|
| 1       | CH <sub>2</sub> Cl <sub>2</sub> | <b>5.CI</b> | Semi-high dilution                                  | 2                    | 5                     |
| 2       | CH <sub>2</sub> Cl <sub>2</sub> | <b>5.CI</b> | High dilution                                       | < 2                  | 3                     |
| 3       | CH <sub>2</sub> Cl <sub>2</sub> | -           | High dilution                                       | -                    | -                     |
| 4       | CHCl <sub>3</sub>               | <b>5.CI</b> | Semi-high dilution                                  | < 2                  | 6                     |
| 5       | CHCl <sub>3</sub>               | -           | High dilution                                       | -                    | 5                     |

<sup>a</sup>High dilution attempts were conducted as follows: Et<sub>3</sub>N (5.0 eq) was dissolved in dry solvent (100 mL). Solutions of tetra-acid chloride **4** (1.0 eq) in dry solvent (100 mL) and bis-amine **3** (2.0 eq, with or without the presence of template **5.CI**, 2.0 eq) in dry solvent (100 mL) were added dropwise simultaneously to the above basic solution. The reaction was stirred for 16 hours, then washed with 10% citric acid (2 x 100 mL) and brine (1 x 100 mL). The organic layer was dried (MgSO<sub>4</sub>) and concentrated *in vacuo*. The crude material was then purified by silica gel column chromatography.

<sup>b</sup>Semi-high dilution attempts were conducted as follows: Bis-amine **3** (2.0 eq) and template **5.CI** (2.0 eq) were dissolved in dry solvent (60 mL). Et<sub>3</sub>N (5.0 eq) was added followed immediately by a dropwise solution of tetra-acid chloride **4** (1.0 eq) in dry solvent (30 mL). Following addition, the solution was allowed to stir for 4 hours. Then the reaction mixture was washed with 10% citric acid (2 x 100 mL) and brine (1 x 100 mL). The organic layer was dried (MgSO<sub>4</sub>) and concentrated *in vacuo*. The crude material was then purified by silica gel column chromatography.

## Part 2: Characterization Spectra

### Bis-Nitrile 2

$^1\text{H}$  NMR (400 MHz,  $\text{CDCl}_3$ )

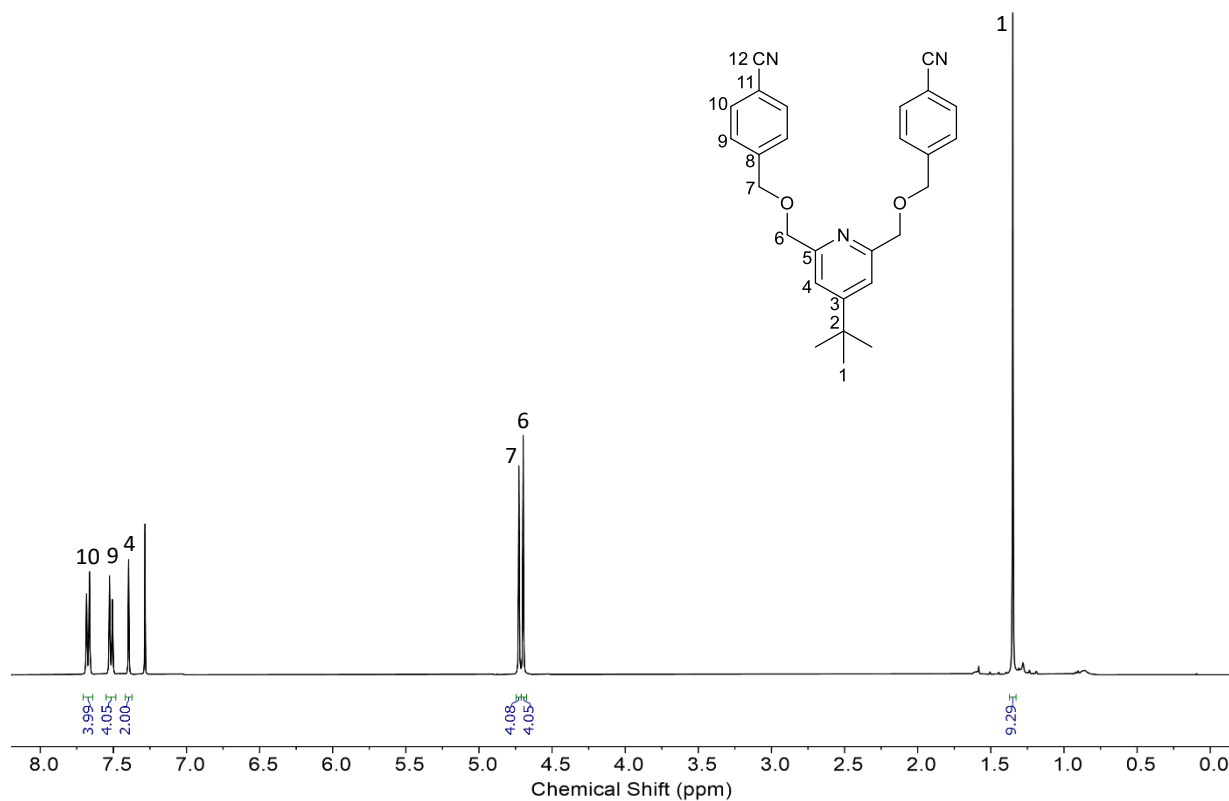

$^{13}\text{C}$  NMR (100 MHz,  $\text{CDCl}_3$ )

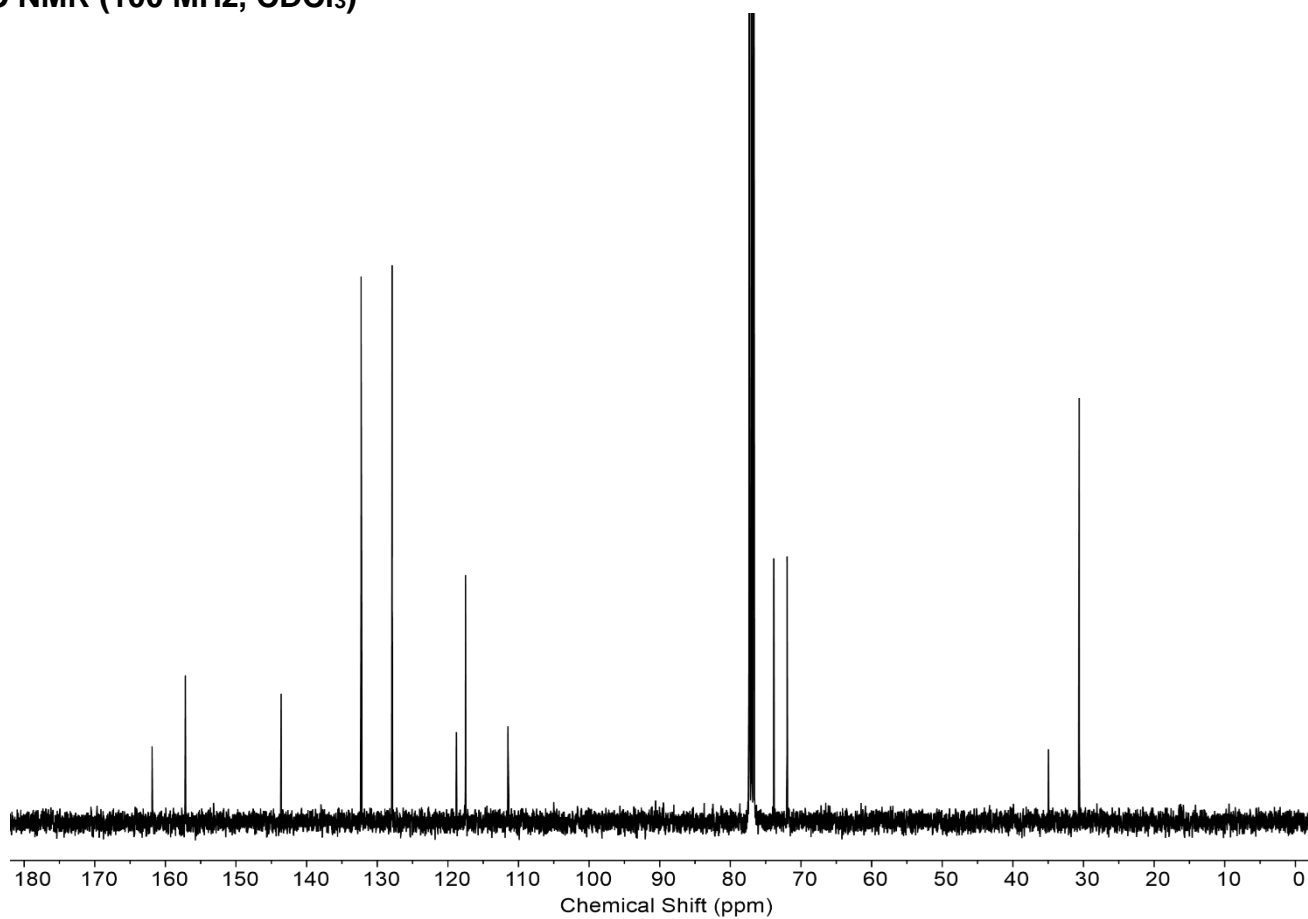

## IR Spectrum (neat)

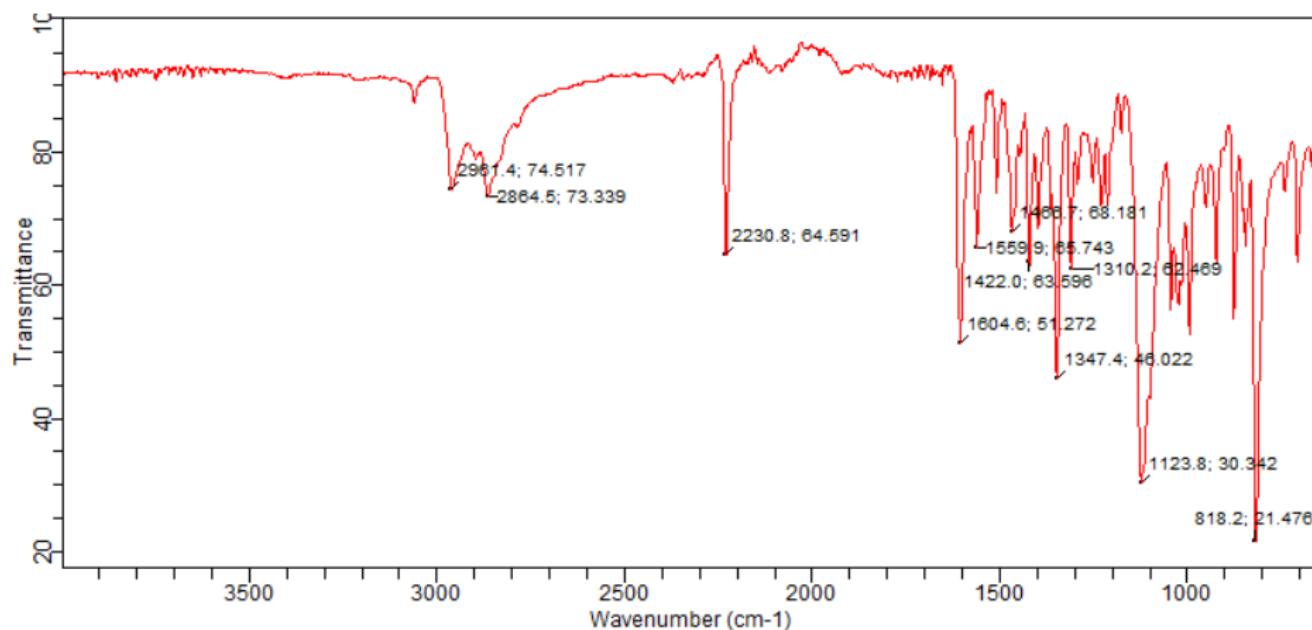

## HRMS (ES +ve)

Measured region for 448.1982 m/z

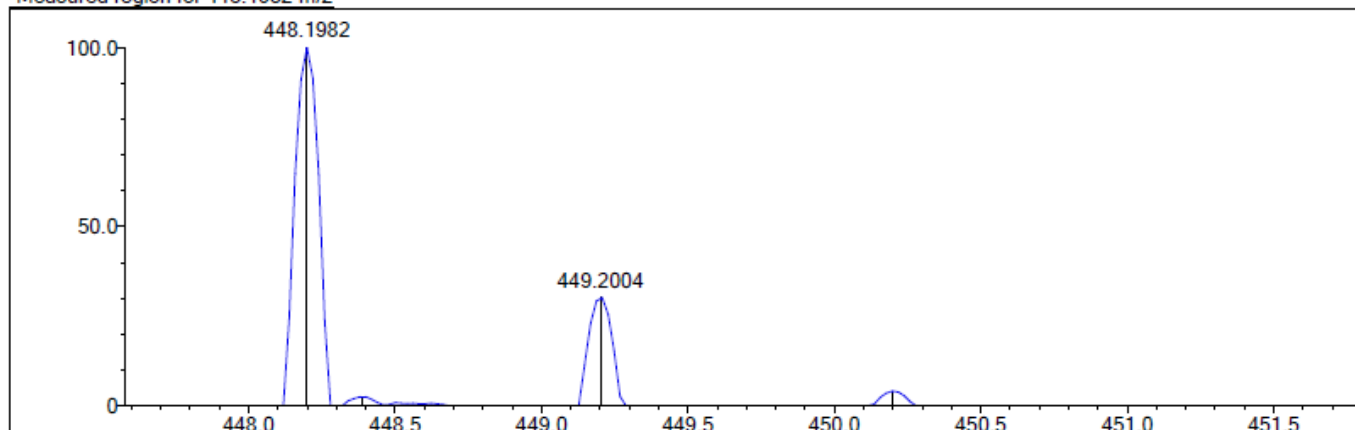

C<sub>27</sub>H<sub>27</sub>N<sub>3</sub>O<sub>2</sub> [M+Na]<sup>+</sup>: Predicted region for 448.1995 m/z

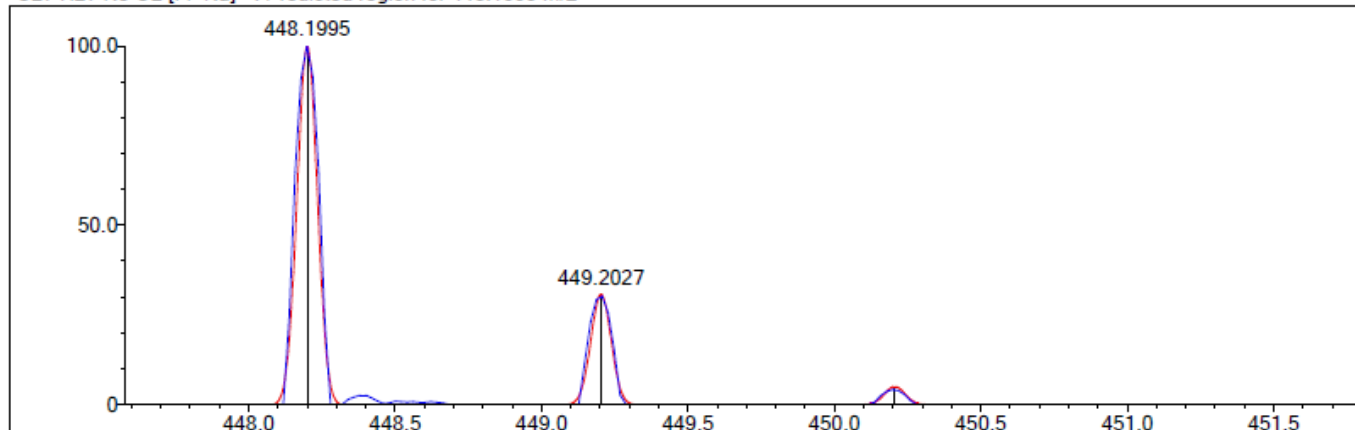

| Rank | Score | Formula (M)                                                   | Ion                 | Meas. m/z | Pred. m/z | Df. (mDa) | Df. (ppm) | Iso    | DBE  |
|------|-------|---------------------------------------------------------------|---------------------|-----------|-----------|-----------|-----------|--------|------|
| 1    | 95.25 | C <sub>27</sub> H <sub>27</sub> N <sub>3</sub> O <sub>2</sub> | [M+Na] <sup>+</sup> | 448.1982  | 448.1995  | -1.3      | -2.90     | 100.00 | 16.0 |

## Bis-Amine 3

$^1\text{H}$  NMR (400 MHz,  $\text{CDCl}_3$ )

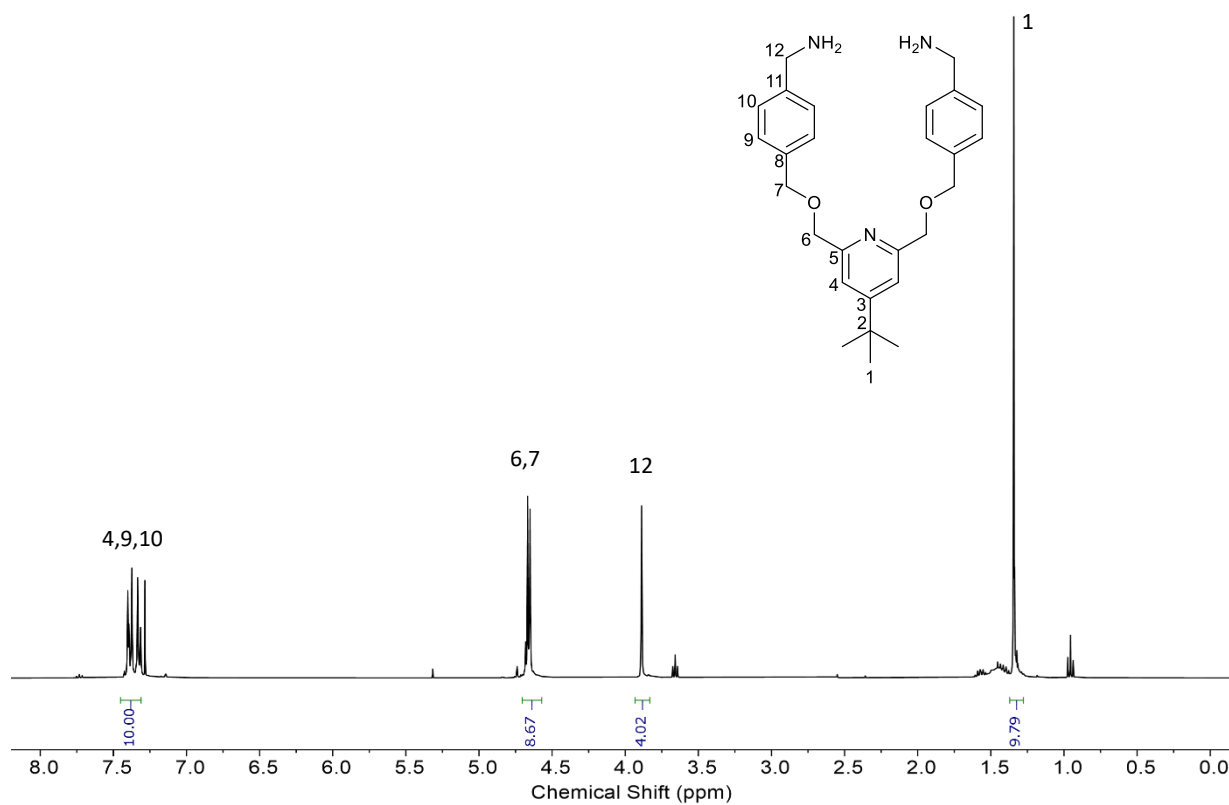

$^{13}\text{C}$  NMR (100 MHz,  $\text{CDCl}_3$ )

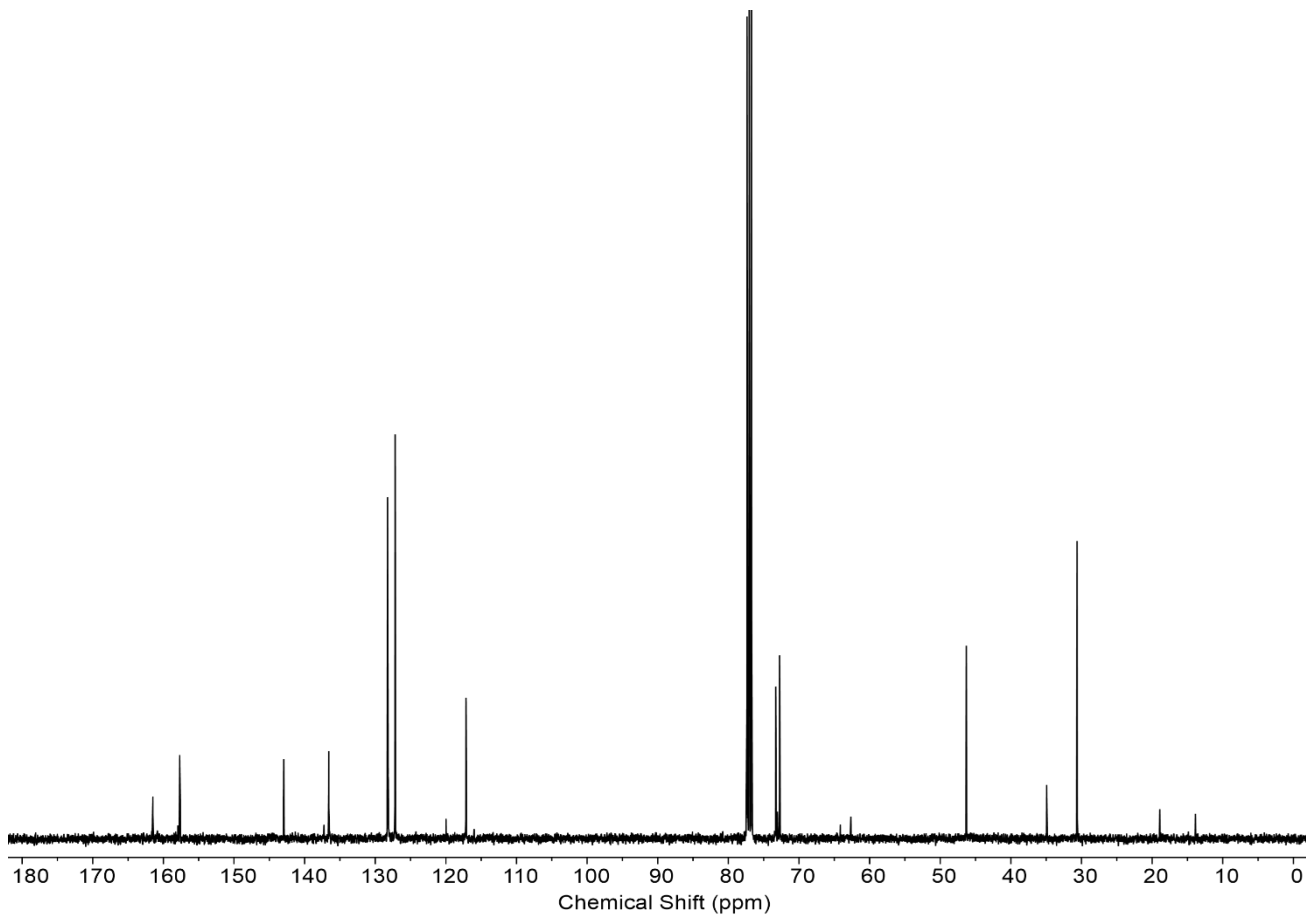

## IR Spectrum (neat)

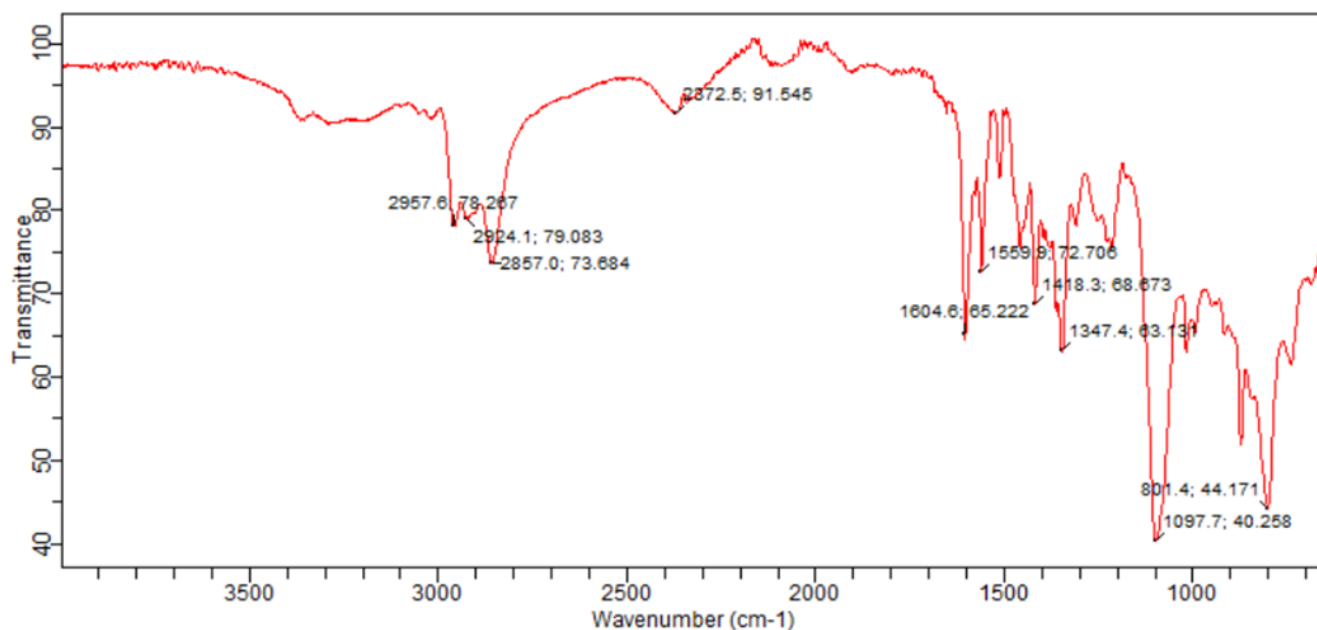

## HRMS (ES +ve)

Measured region for 456.2619 m/z

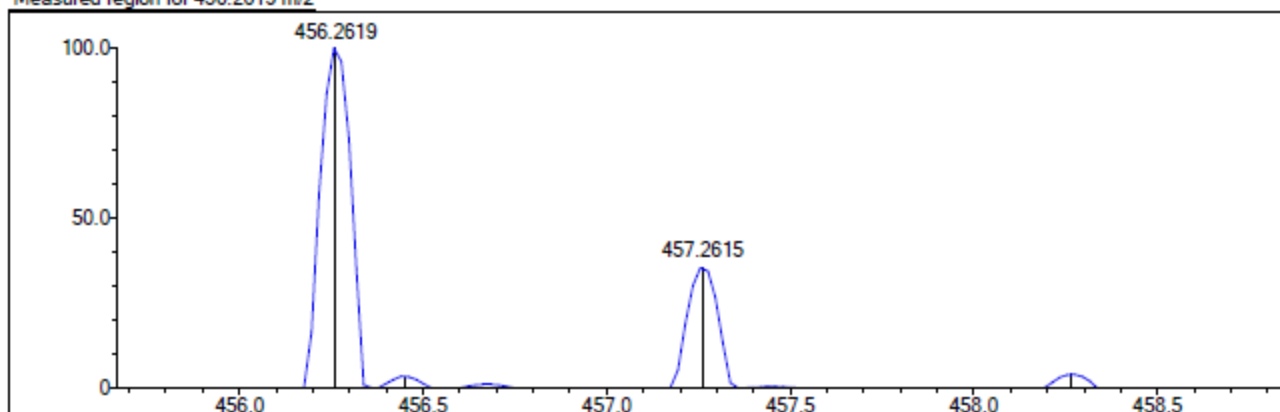

C<sub>27</sub>H<sub>35</sub>N<sub>3</sub>O<sub>2</sub> [M+Na]<sup>+</sup> : Predicted region for 456.2621 m/z

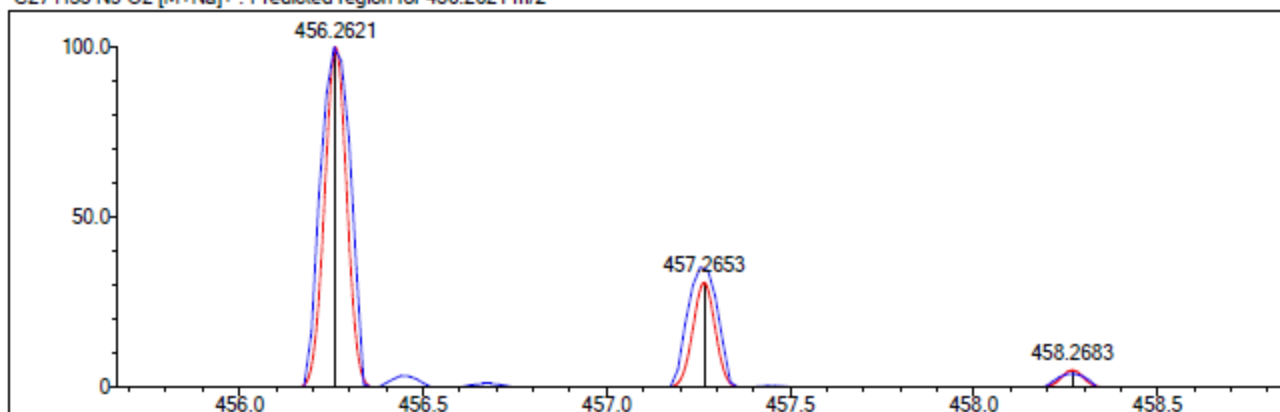

| Rank | Score | Formula (M)                                                   | Ion                 | Meas. m/z | Pred. m/z | Df. (mDa) | Df. (ppm) | Iso   | DBE  |
|------|-------|---------------------------------------------------------------|---------------------|-----------|-----------|-----------|-----------|-------|------|
| 1    | 95.60 | C <sub>27</sub> H <sub>35</sub> N <sub>3</sub> O <sub>2</sub> | [M+Na] <sup>+</sup> | 456.2619  | 456.2621  | -0.2      | -0.44     | 95.60 | 12.0 |

# Bis-Macrocyclic BM1

$^1\text{H}$  NMR (400 MHz,  $\text{CDCl}_3$ )

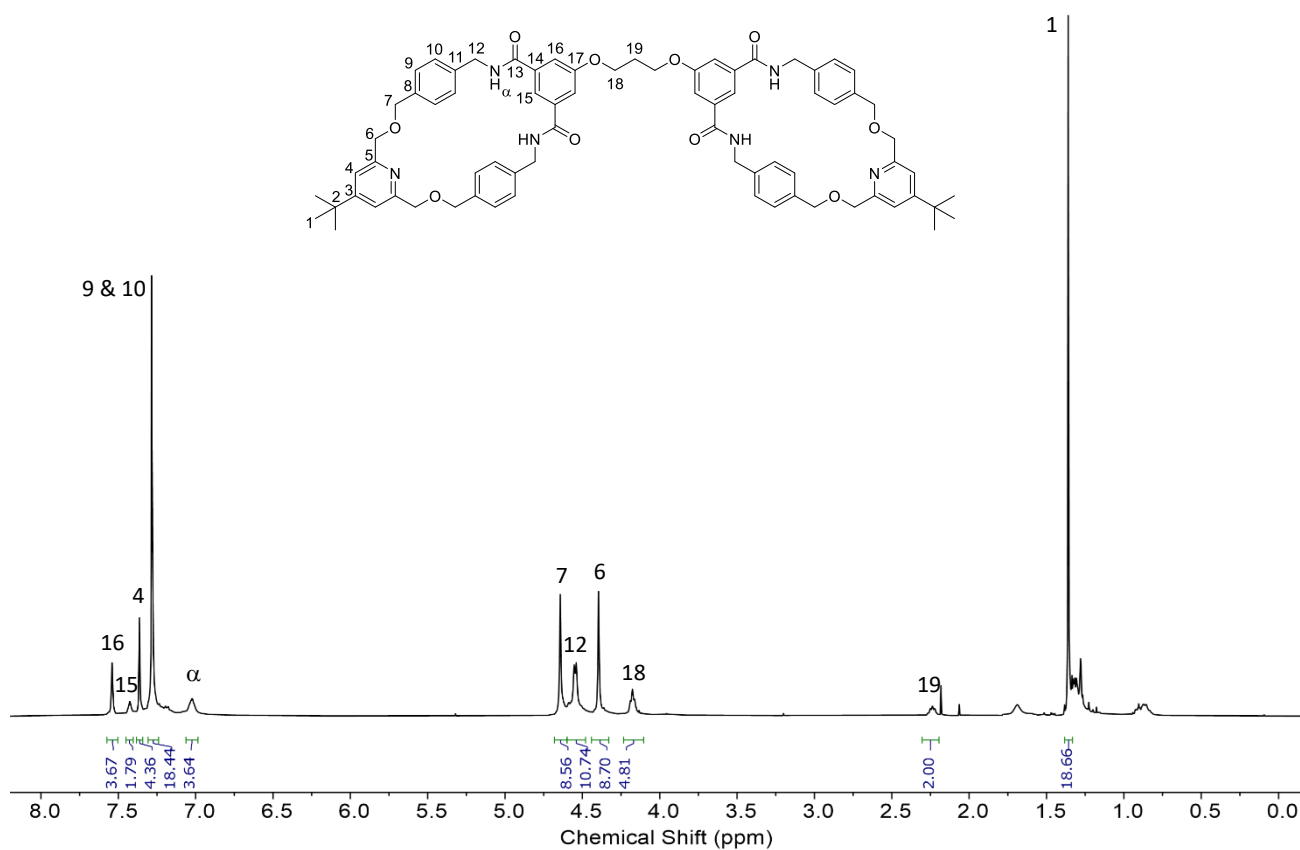

$^{13}\text{C}$  NMR (100 MHz,  $\text{CDCl}_3$ )

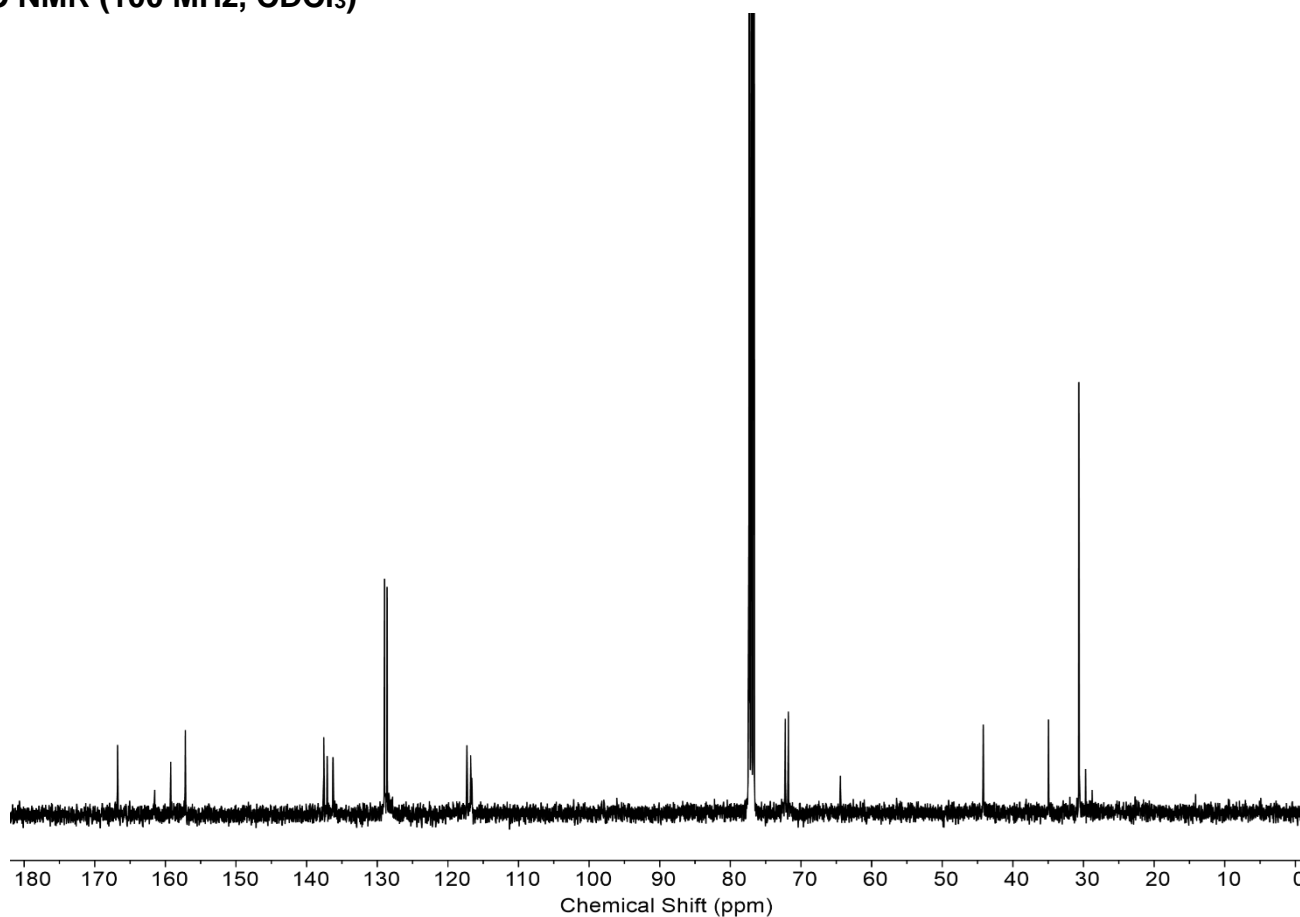

## IR Spectrum (neat)

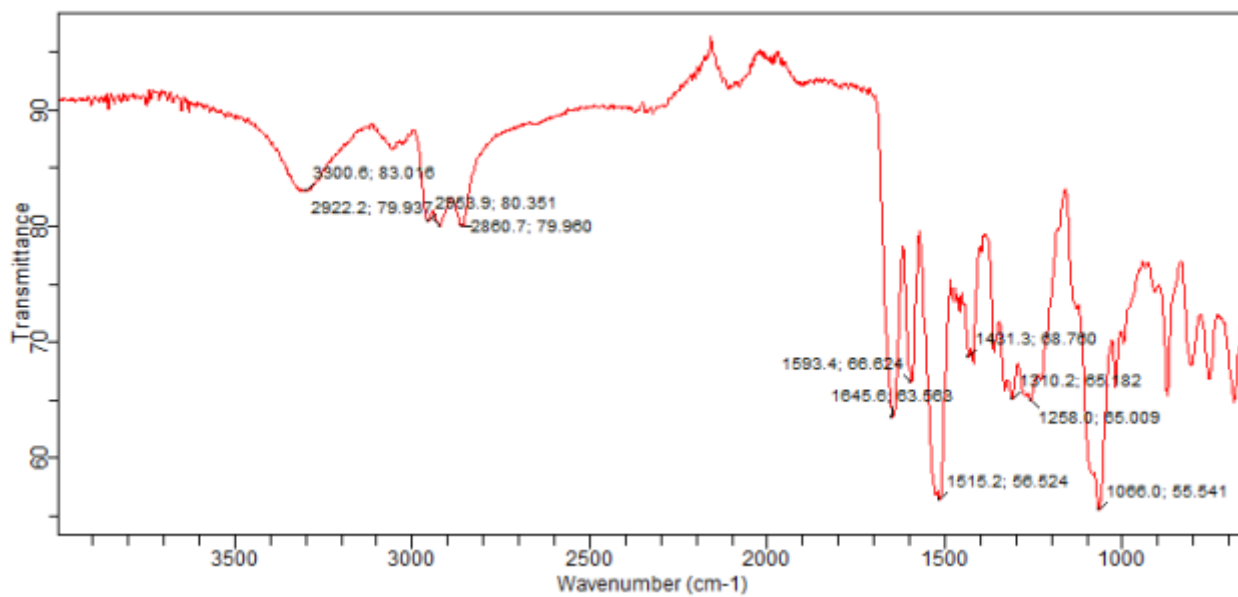

## HRMS (ES +ve)

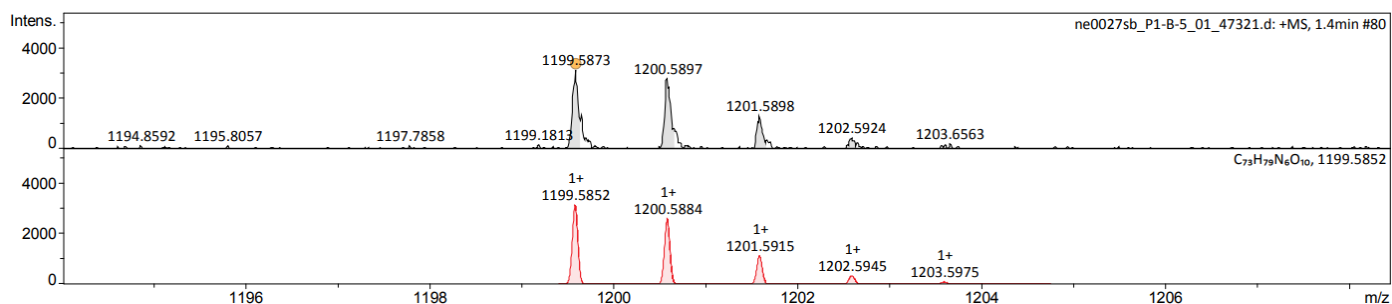

| Meas. m/z | # | Ion Formula                                                    | m/z       | err [ppm] | err [mDa] | mSigma | Mean err [ppm] |
|-----------|---|----------------------------------------------------------------|-----------|-----------|-----------|--------|----------------|
| 1199.5873 | 1 | C <sub>73</sub> H <sub>79</sub> N <sub>6</sub> O <sub>10</sub> | 1199.5852 | -1.7      | -2.0      | 45.1   | -0.4           |



# TBDMS Protected Macrocycle 7

$^1\text{H}$  NMR (400 MHz,  $\text{CDCl}_3$ )

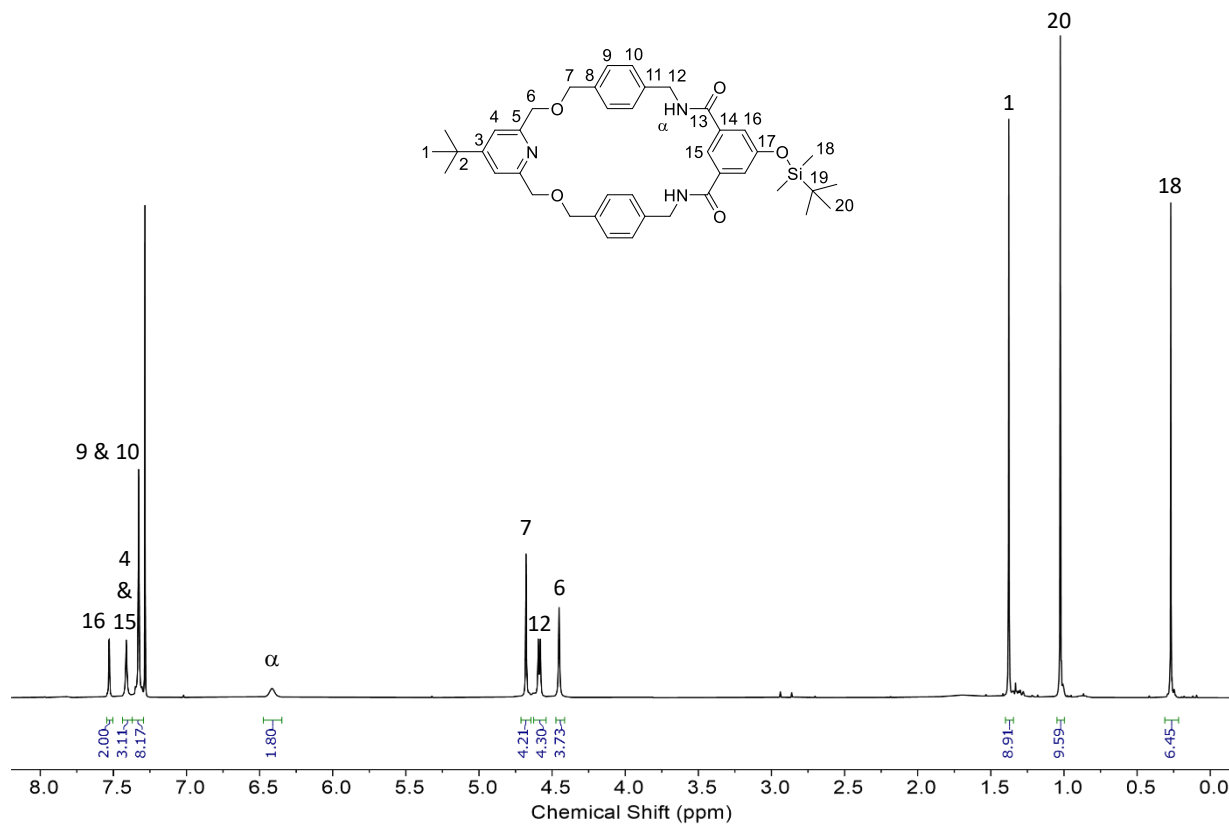

$^{13}\text{C}$  NMR (100 MHz,  $\text{CDCl}_3$ )

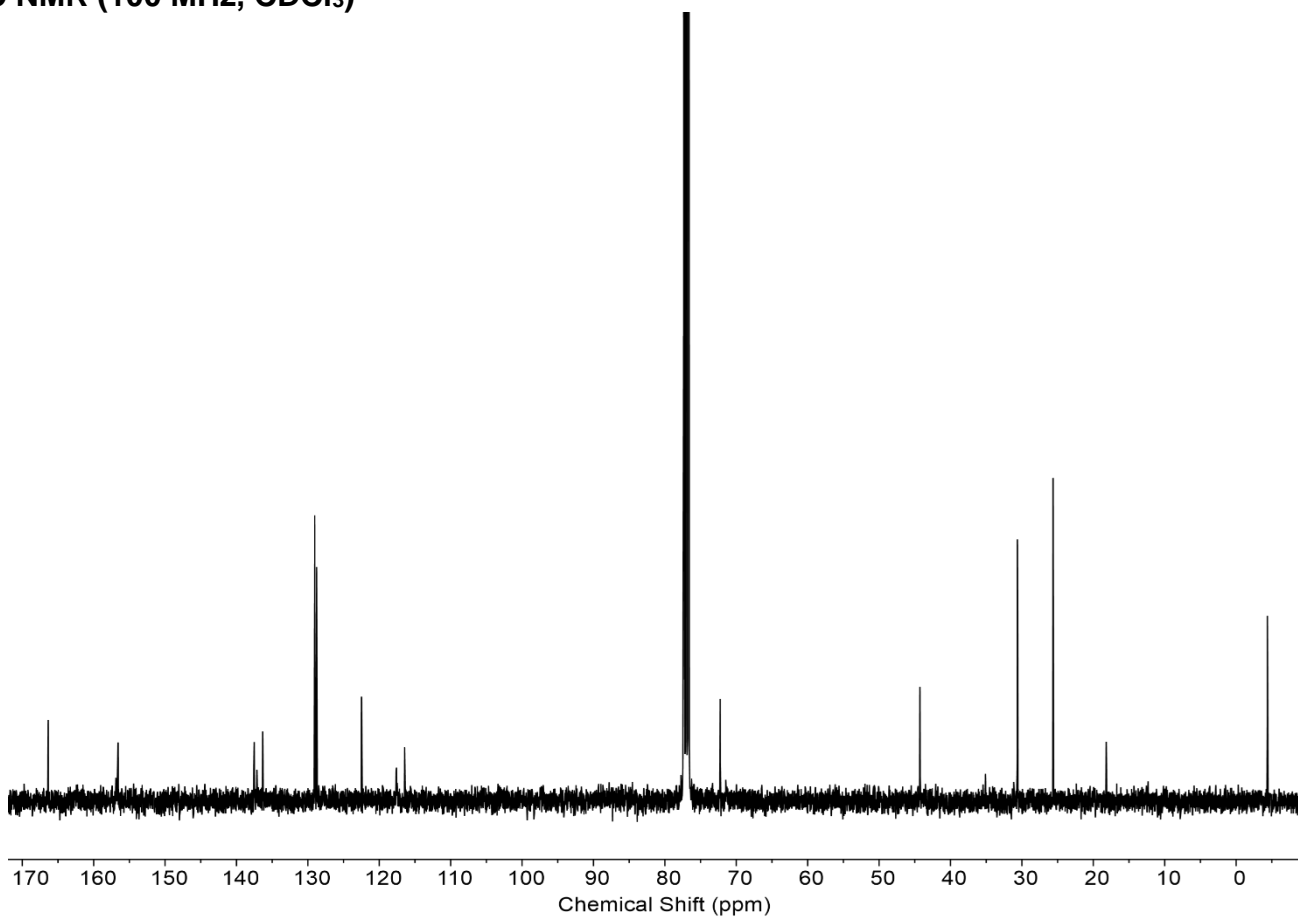

## IR Spectrum (neat)

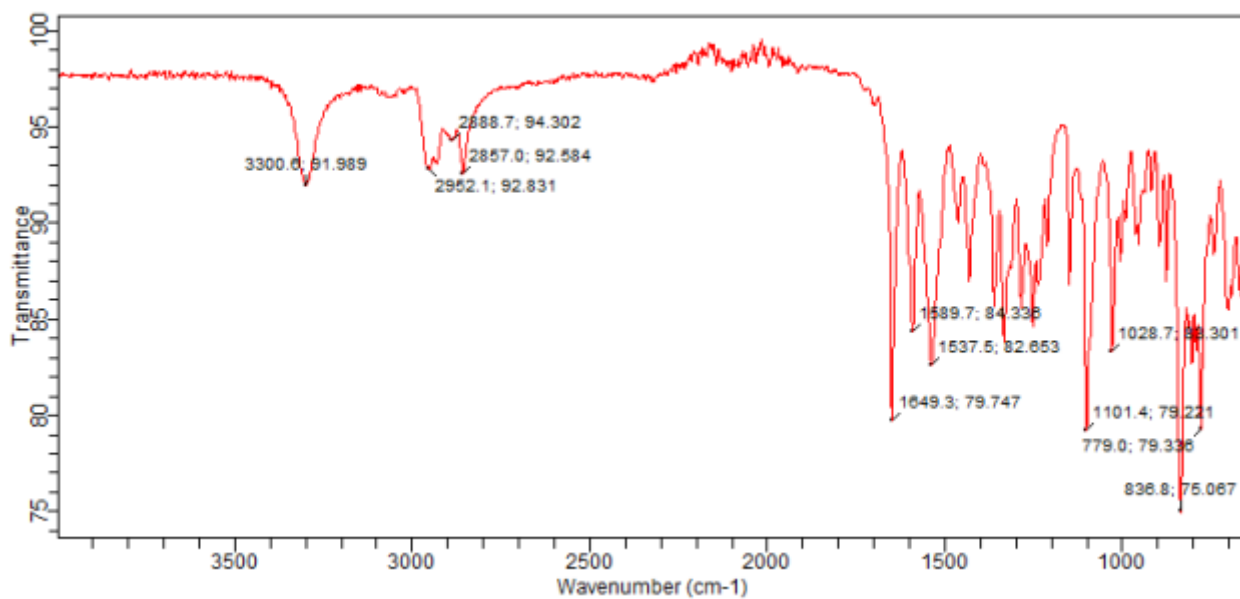

## HRMS (ES +ve)

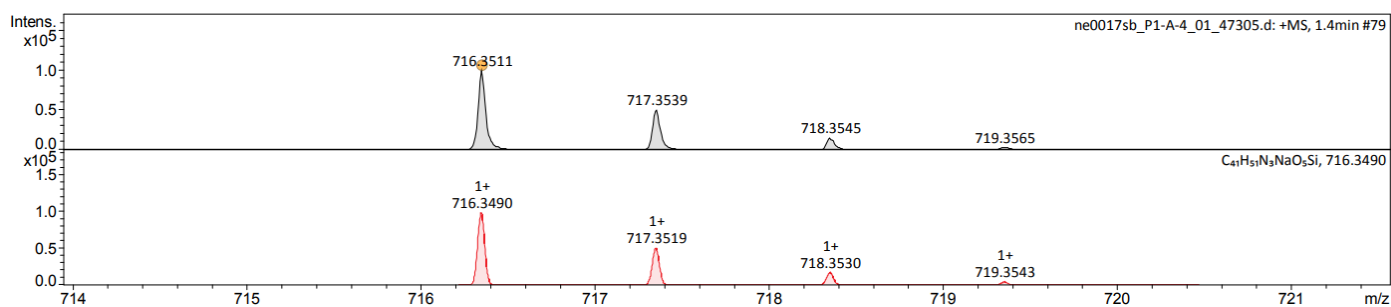

| Meas. m/z | # | Ion Formula                                                        | m/z      | err [ppm] | err [mDa] | mSigma | Mean err [ppm] |
|-----------|---|--------------------------------------------------------------------|----------|-----------|-----------|--------|----------------|
| 694.3684  | 1 | C <sub>41</sub> H <sub>52</sub> N <sub>3</sub> O <sub>5</sub> Si   | 694.3671 | -1.9      | -1.3      | 6.0    | -3.9           |
| 716.3511  | 1 | C <sub>41</sub> H <sub>51</sub> N <sub>3</sub> NaO <sub>5</sub> Si | 716.3490 | -2.9      | -2.1      | 10.2   | -3.5           |

# Phenol Macrocycle 8

$^1\text{H}$  NMR (400 MHz, 1:1  $\text{CDCl}_3:\text{CD}_3\text{OD}$ )

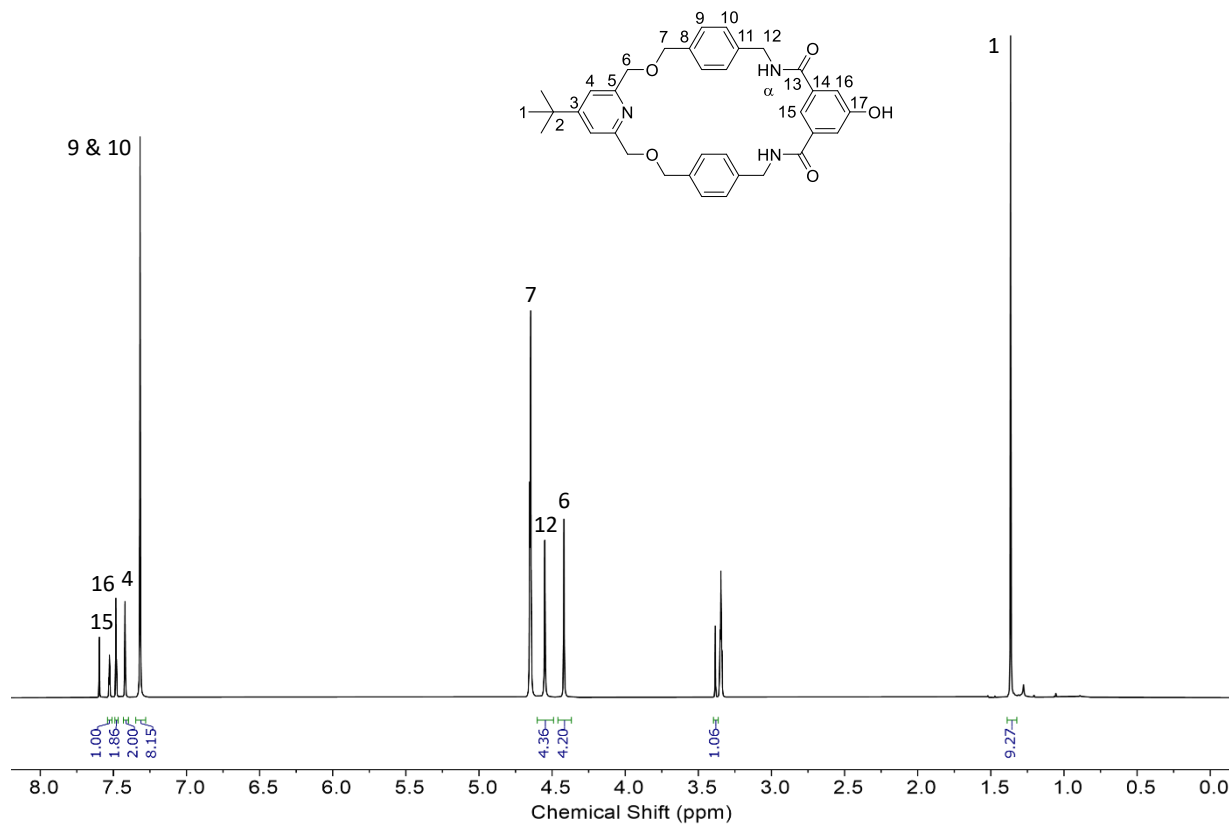

$^{13}\text{C}$  NMR (100 MHz, 1:1  $\text{CDCl}_3:\text{CD}_3\text{OD}$ )

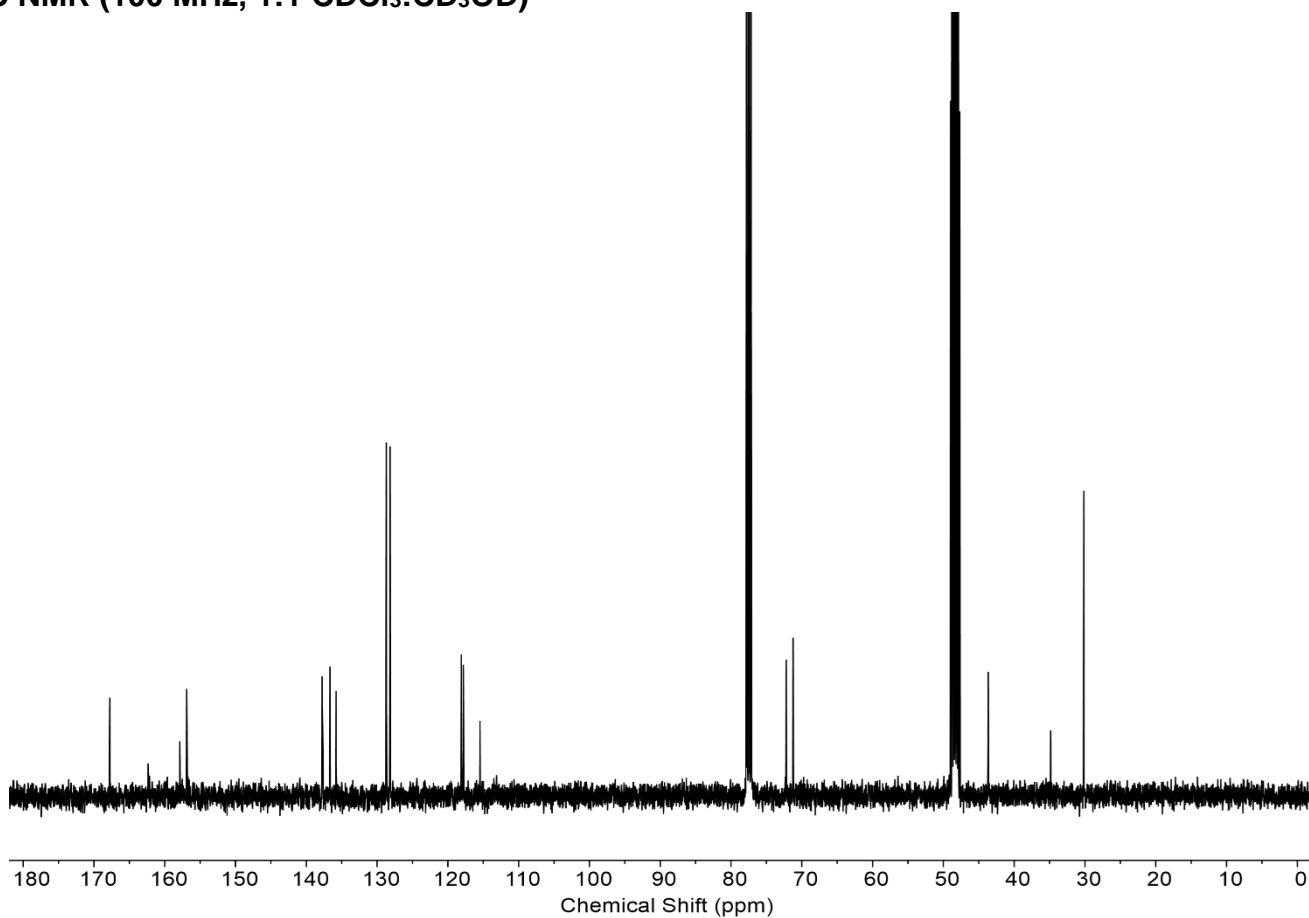

## IR Spectrum (neat)

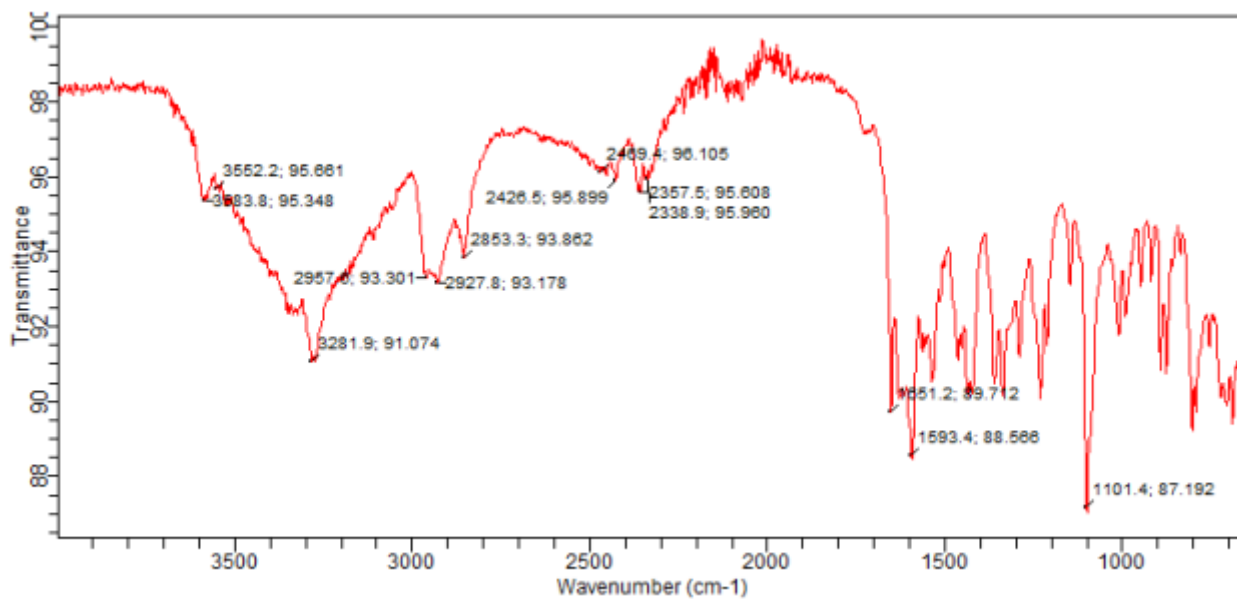

## HRMS (ES +ve)

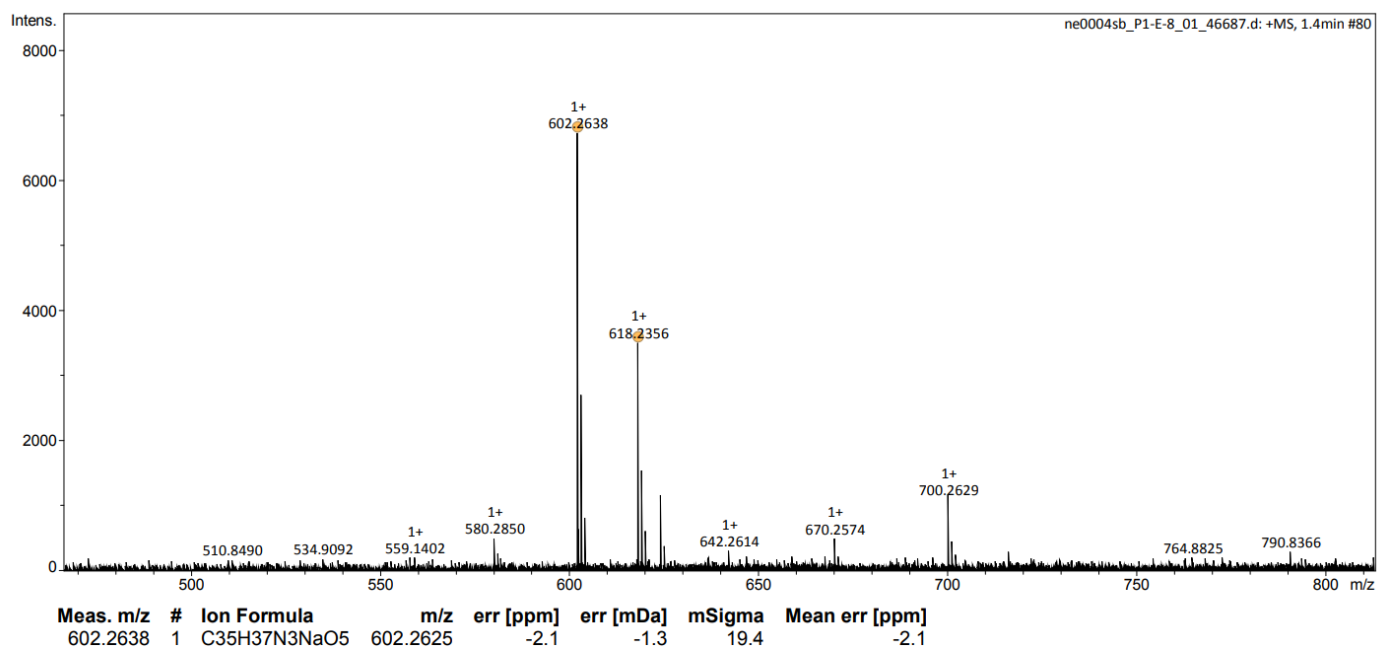

## Bis-Macrocycle BM2

$^1\text{H}$  NMR (400 MHz,  $\text{CDCl}_3$ )

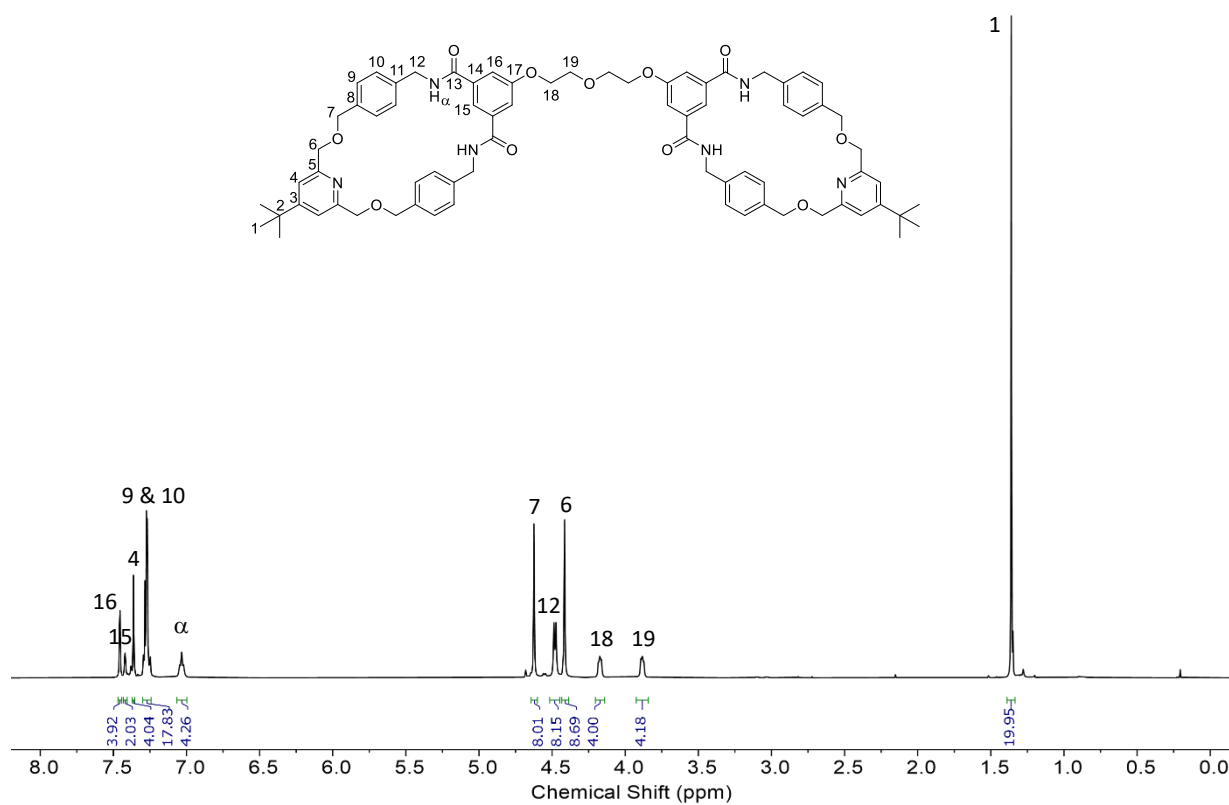

$^{13}\text{C}$  NMR (100 MHz,  $\text{CDCl}_3$ )

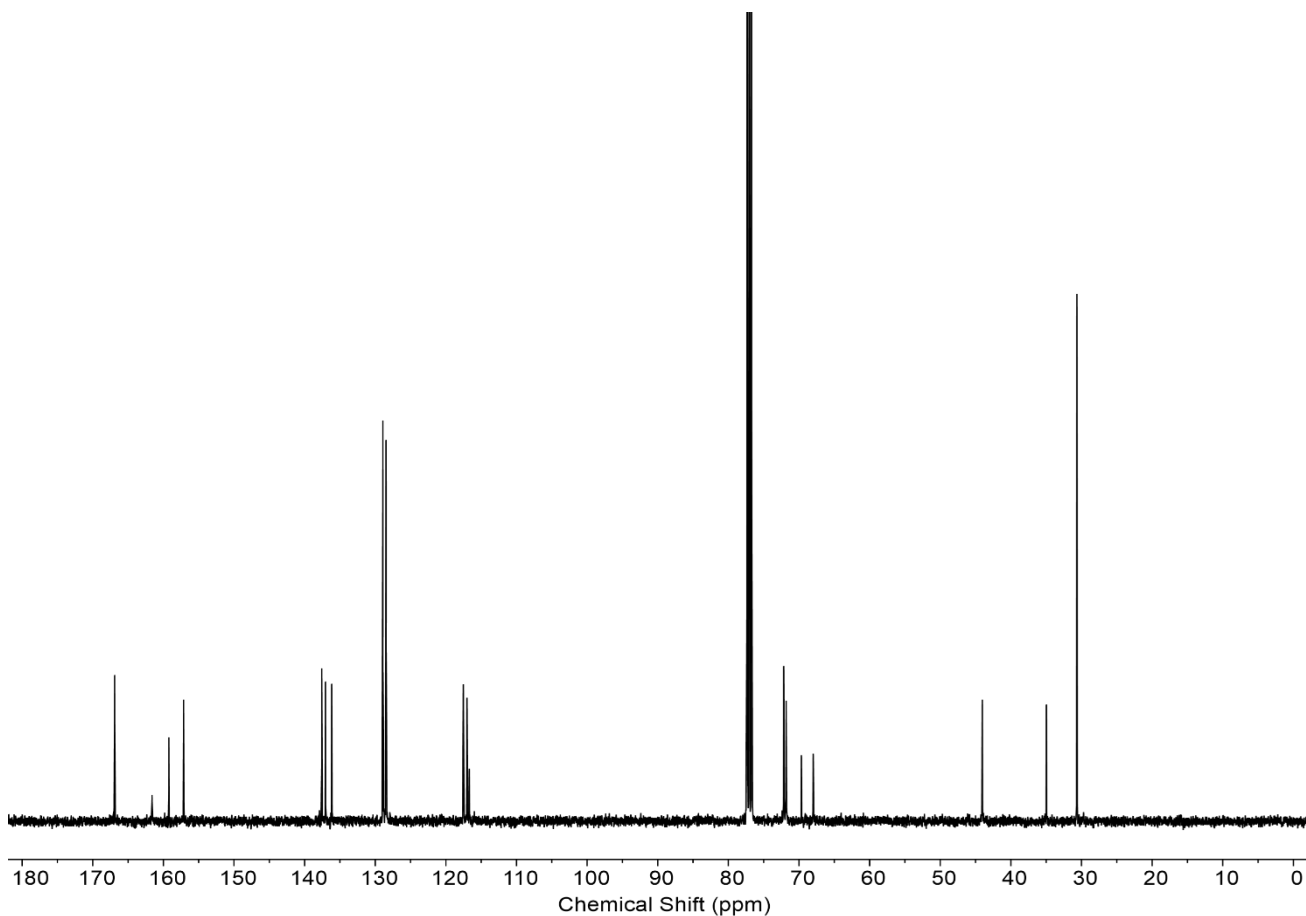

## IR Spectrum (neat)

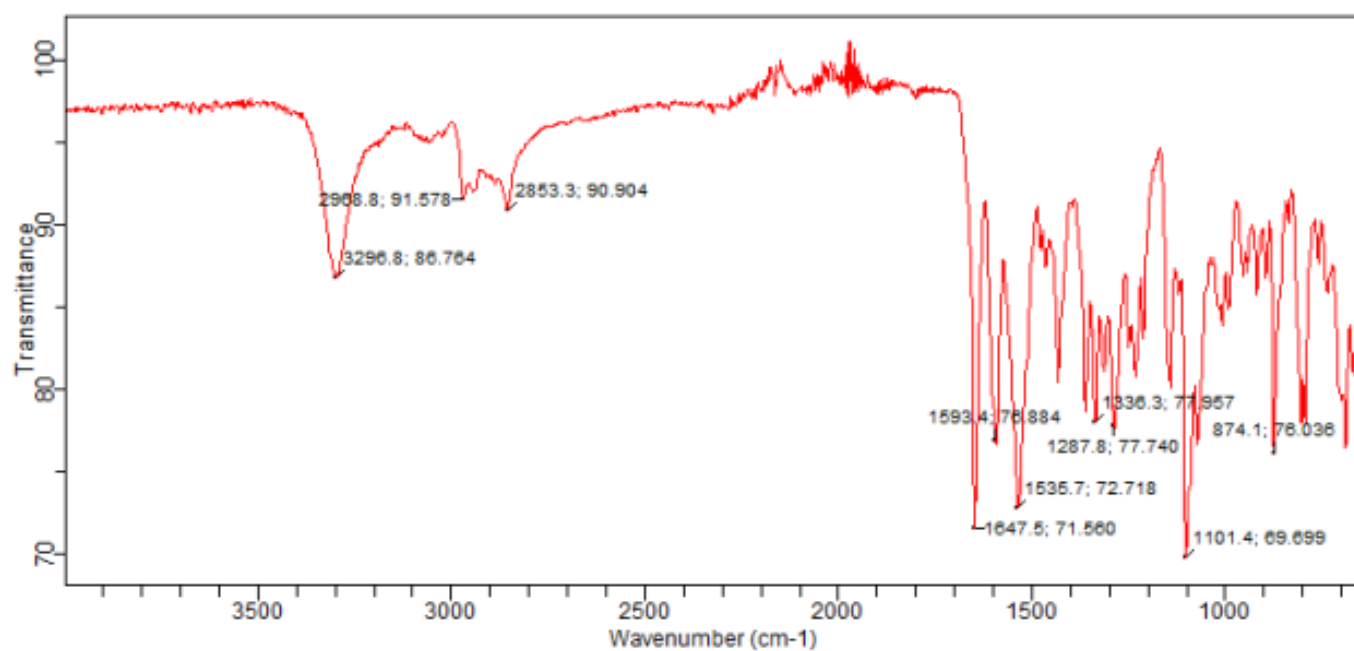

## HRMS (ES +ve)

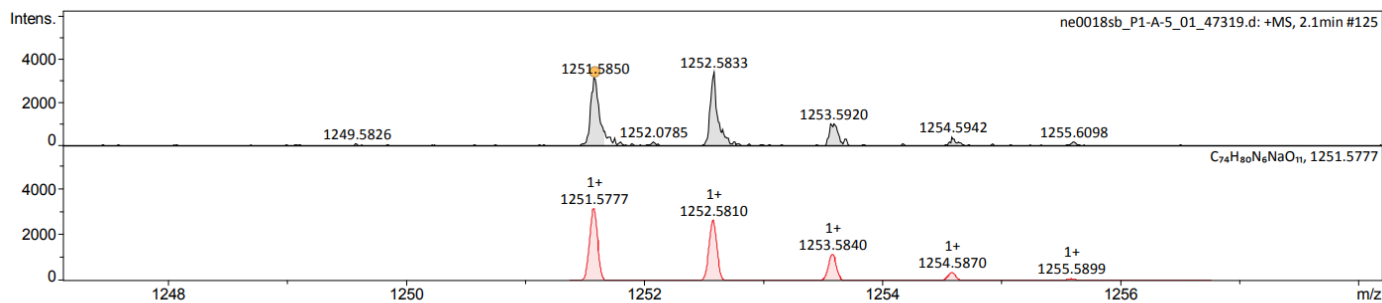

| Meas. m/z | # | Ion Formula                                                      | m/z       | err [ppm] | err [mDa] | mSigma | Mean err [ppm] |
|-----------|---|------------------------------------------------------------------|-----------|-----------|-----------|--------|----------------|
| 1229.5958 | 1 | C <sub>74</sub> H <sub>81</sub> N <sub>6</sub> O <sub>11</sub>   | 1229.5958 | -0.0      | -0.0      | 93.3   | -2.5           |
| 1251.5850 | 1 | C <sub>74</sub> H <sub>80</sub> N <sub>6</sub> NaO <sub>11</sub> | 1251.5777 | -5.8      | -7.3      | 88.1   | -4.2           |

# Handcuff Rotaxane HR1

**<sup>1</sup>H NMR (400 MHz, CDCl<sub>3</sub>) Inset: <sup>19</sup>F NMR (377 MHz, CDCl<sub>3</sub>)**

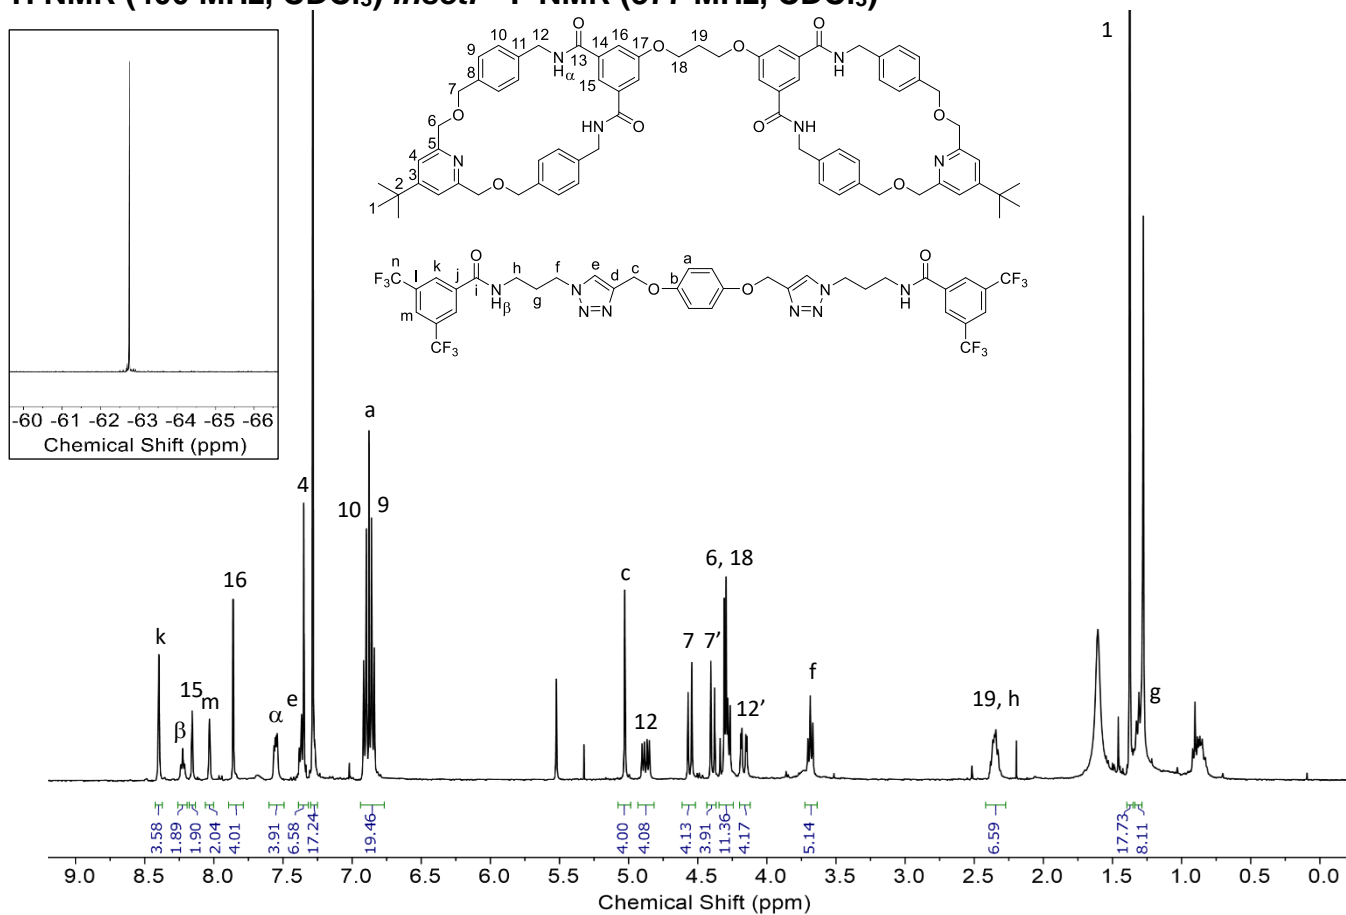

**<sup>13</sup>C NMR (100 MHz, CDCl<sub>3</sub>)**

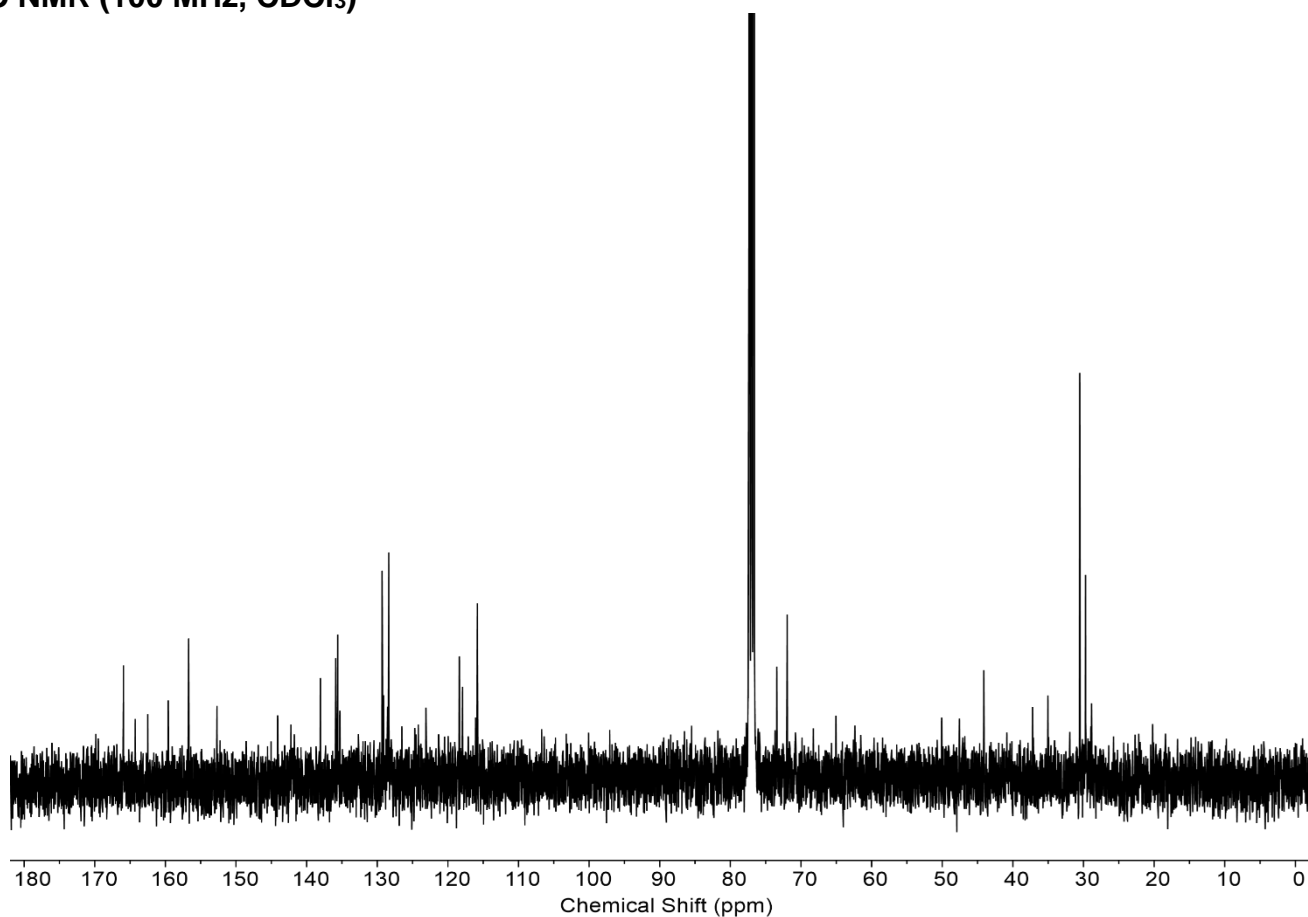

## IR Spectrum (neat)

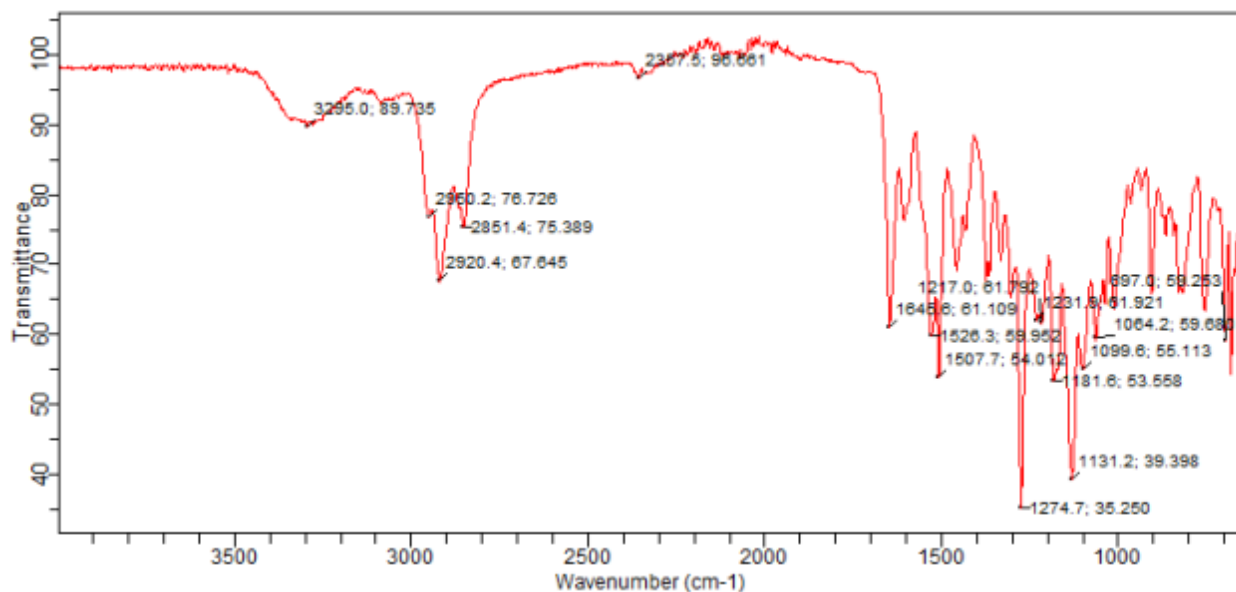

## HRMS (ES +ve)

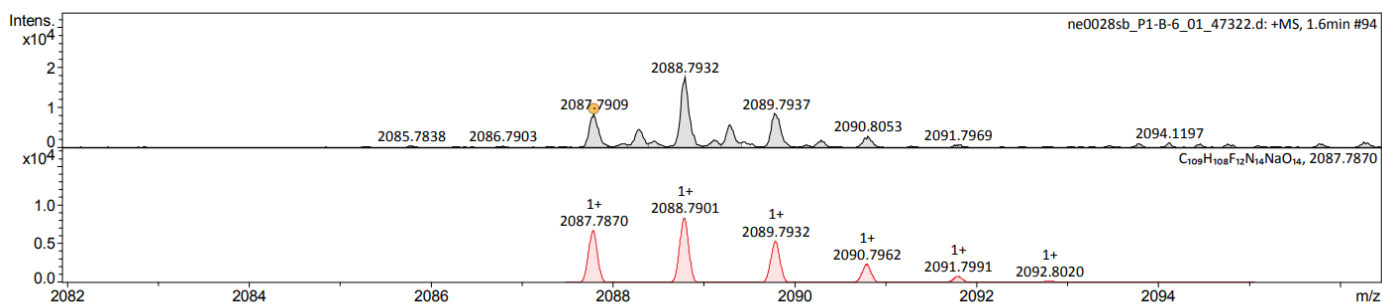



**$^1\text{H}$ - $^1\text{H}$  ROESY NMR (400 MHz,  $\text{CDCl}_3$ ) of HR1 (with intercomponent couplings highlighted)**

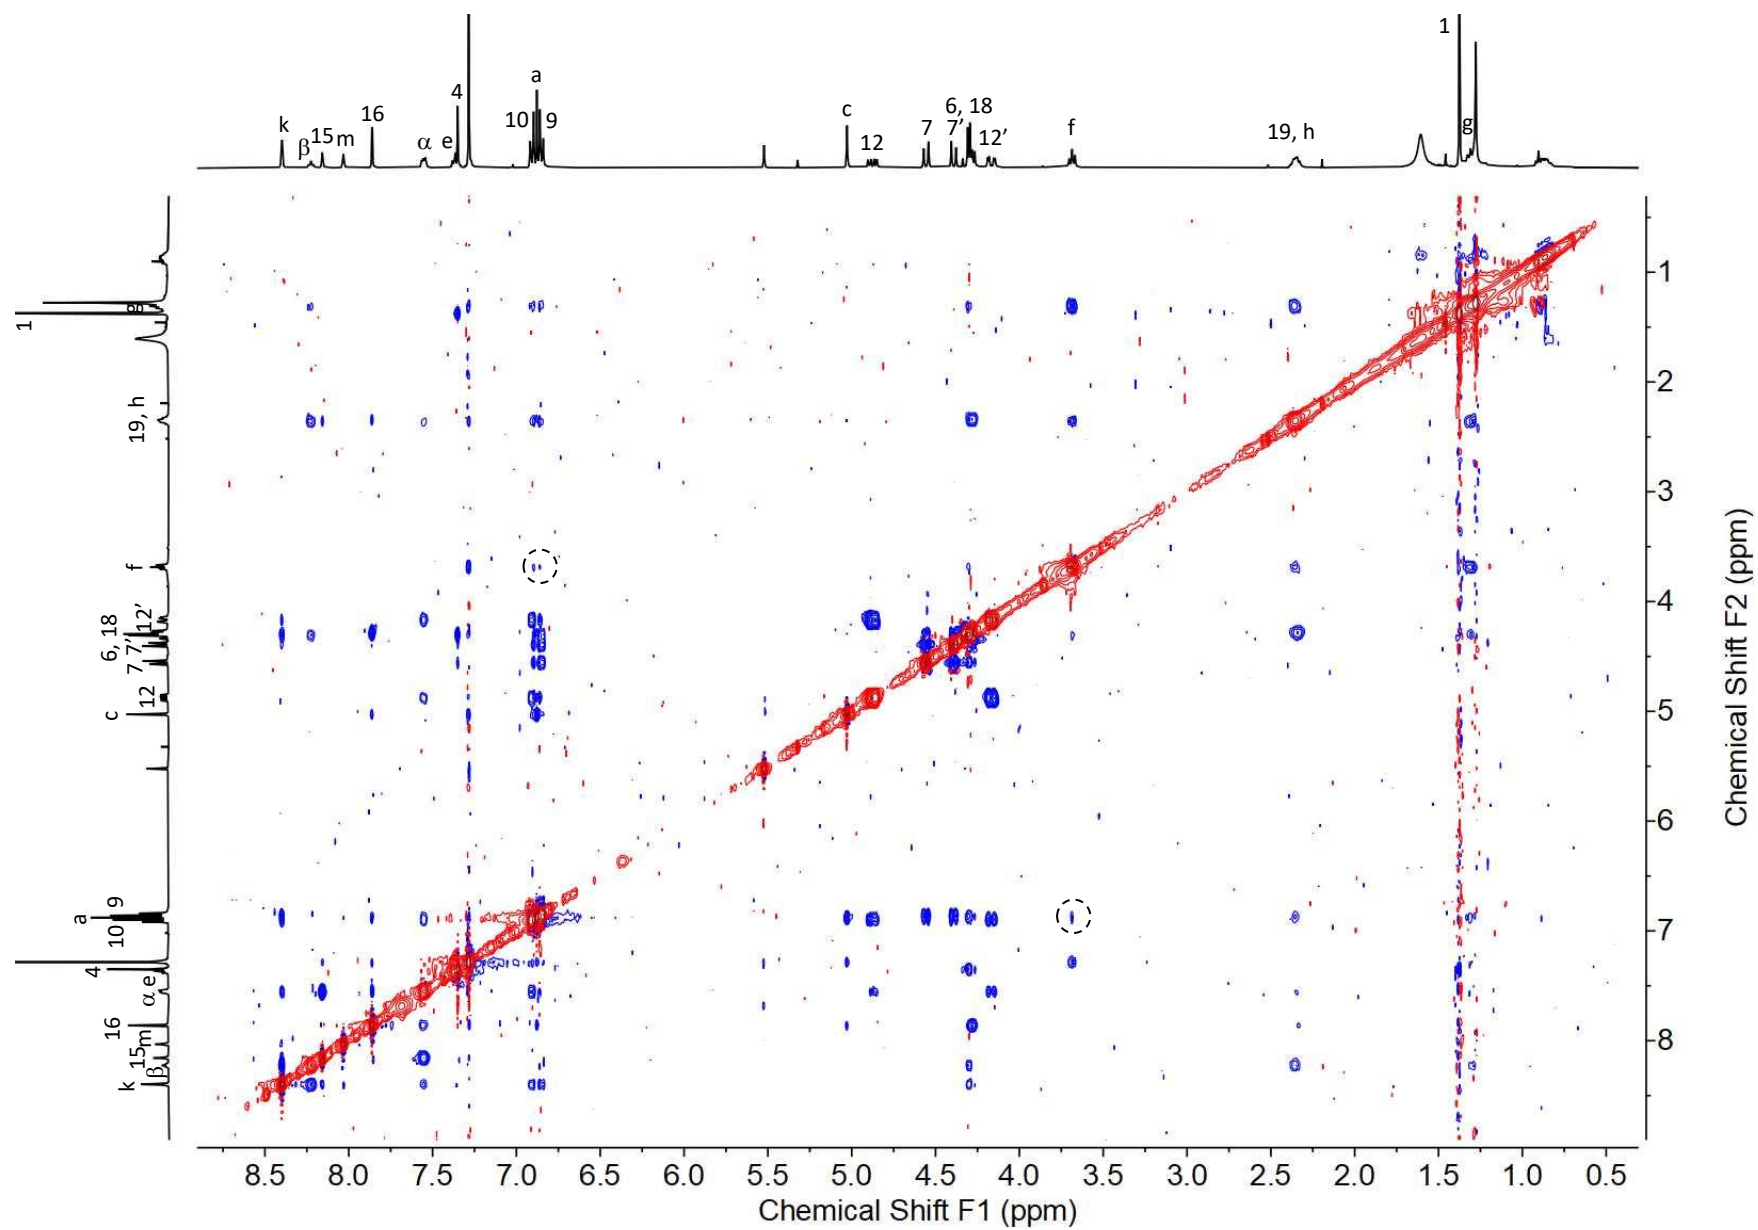

# Handcuff Rotaxane HR2

$^1\text{H}$  NMR (400 MHz,  $\text{CDCl}_3$ ) Inset:  $^{19}\text{F}$  NMR (377 MHz,  $\text{CDCl}_3$ )

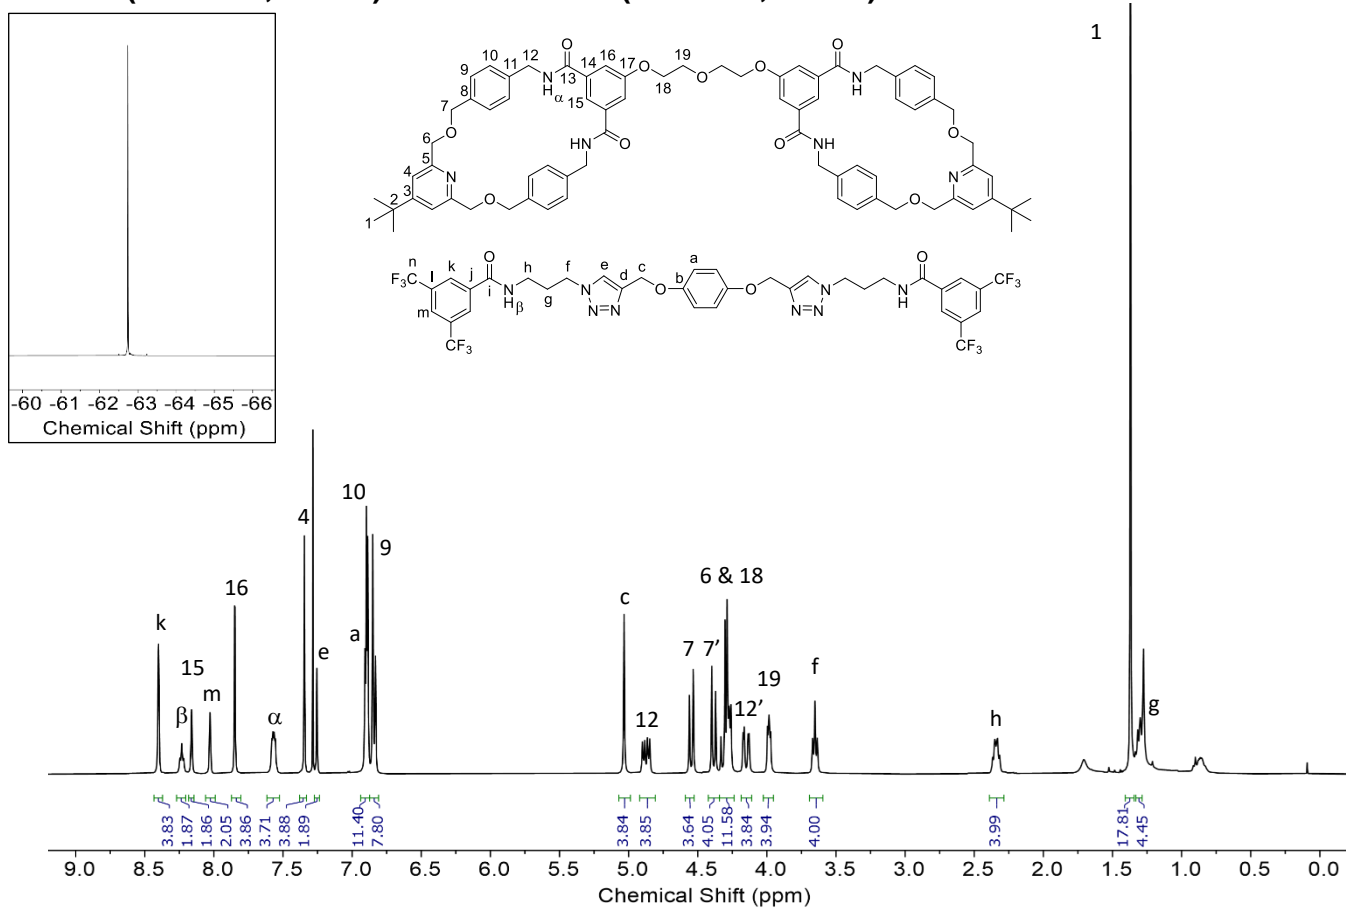

$^{13}\text{C}$  NMR (100 MHz,  $\text{CDCl}_3$ )

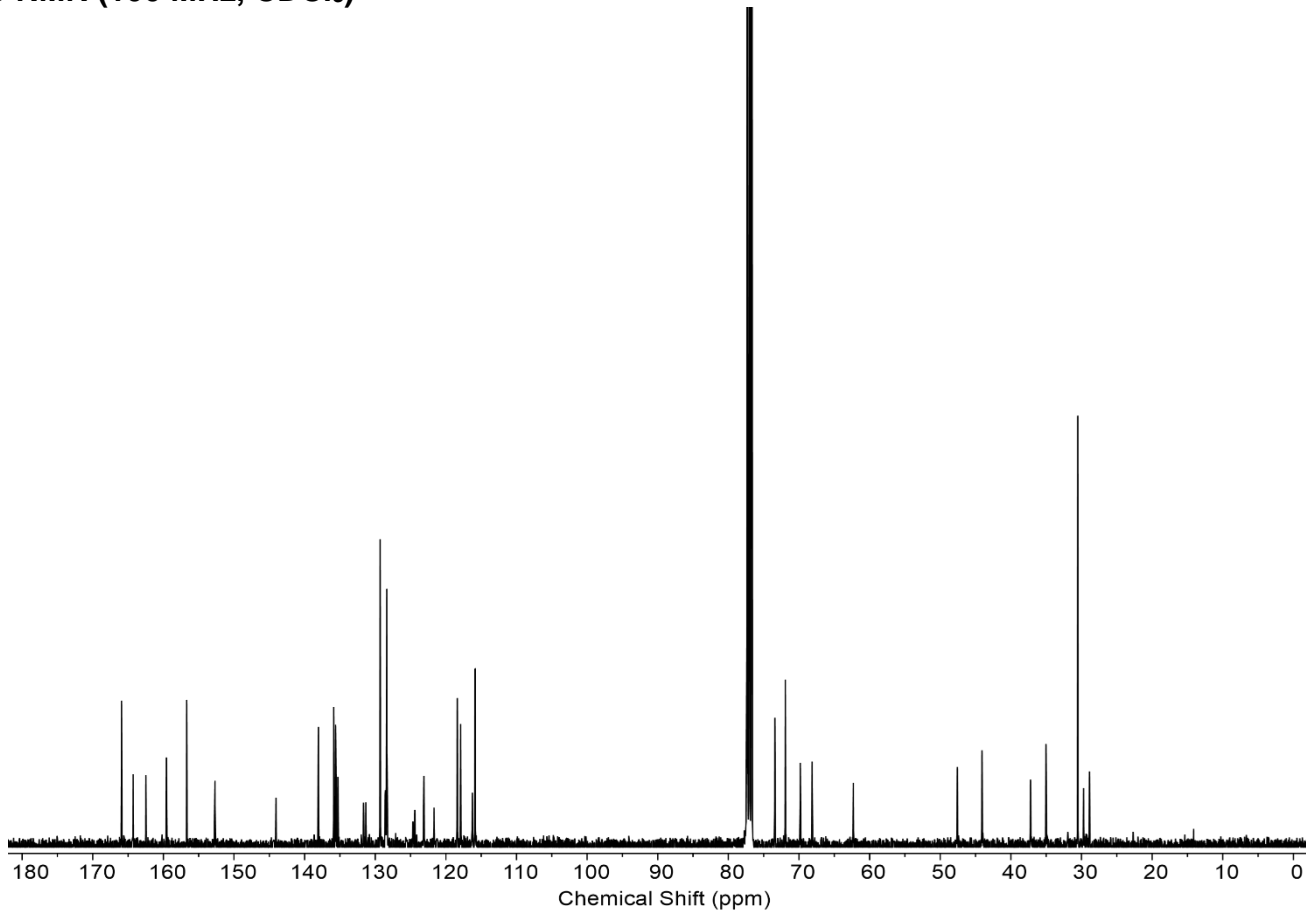

## IR Spectrum (neat)

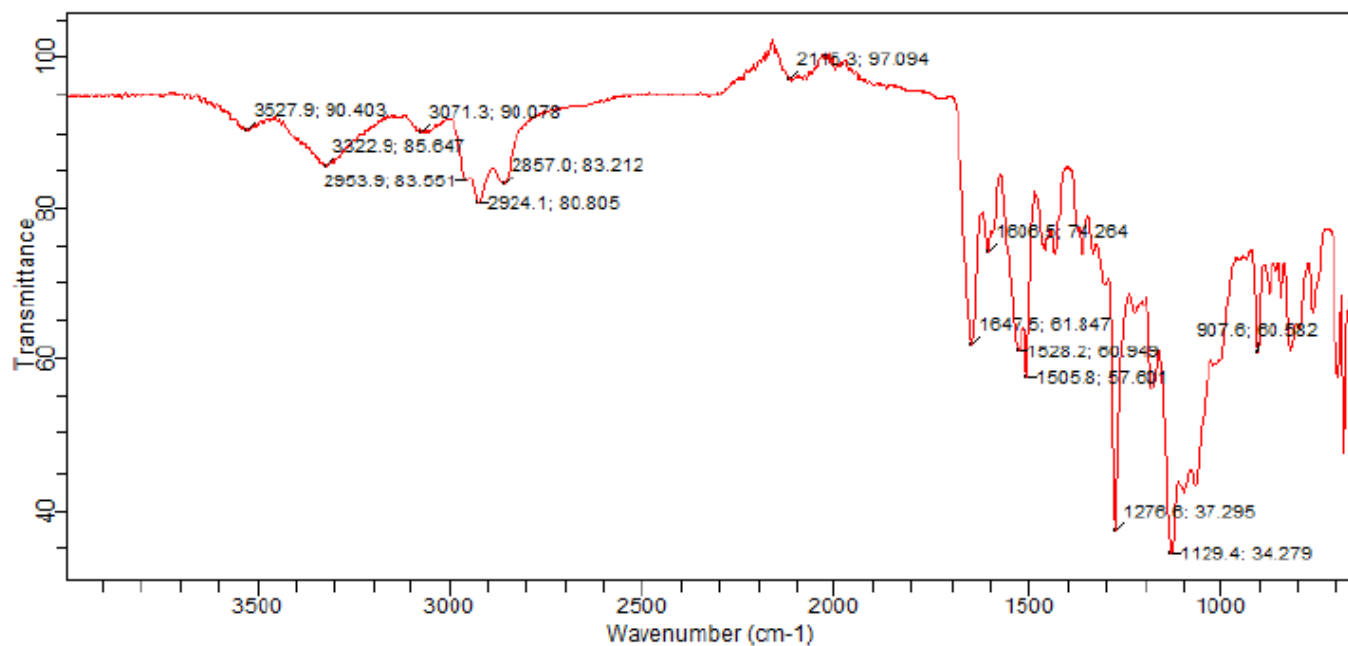

## HRMS (ES +ve)

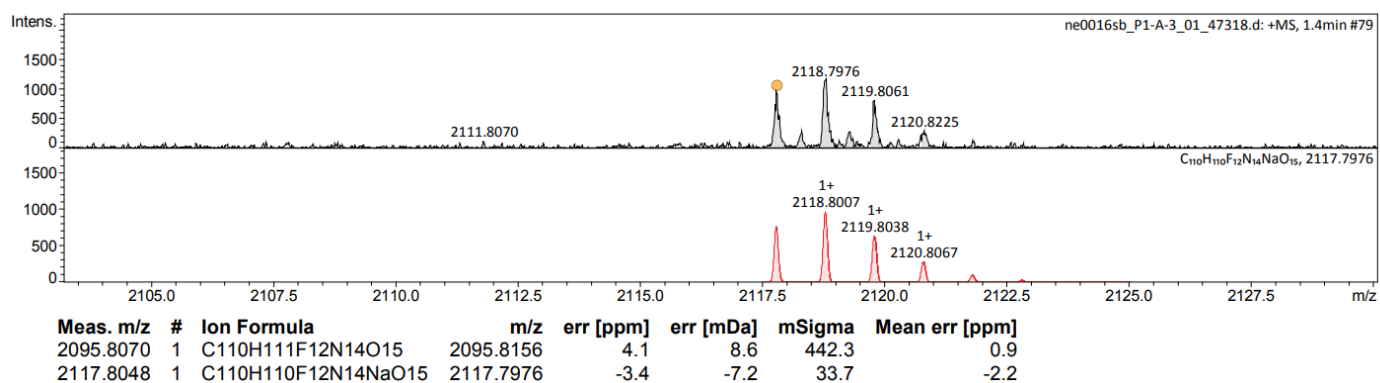

**$^1\text{H}$ - $^1\text{H}$  ROESY NMR (400 MHz,  $\text{CDCl}_3$ ) of HR2 (with intercomponent couplings highlighted)**

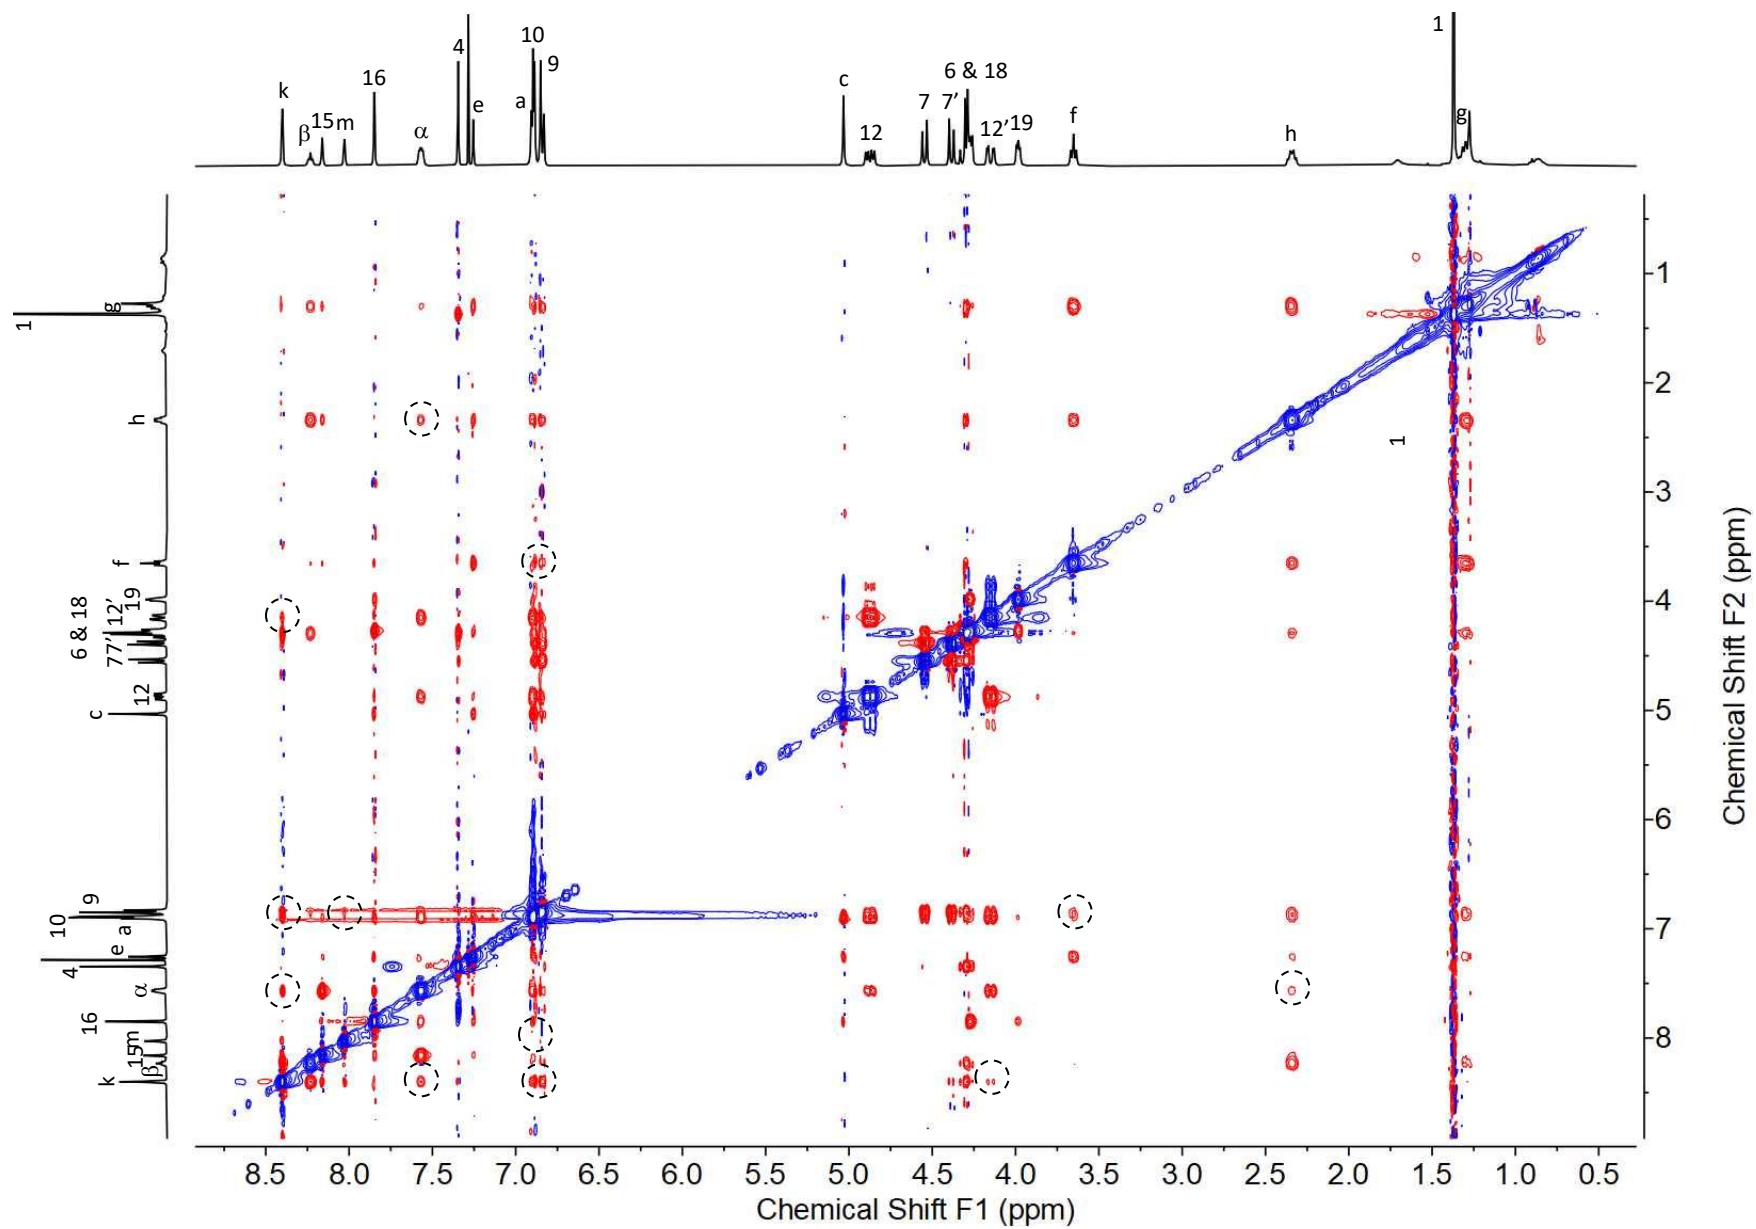

# Bis-Macrocycle BM1'

<sup>1</sup>H NMR (400 MHz, CDCl<sub>3</sub>)

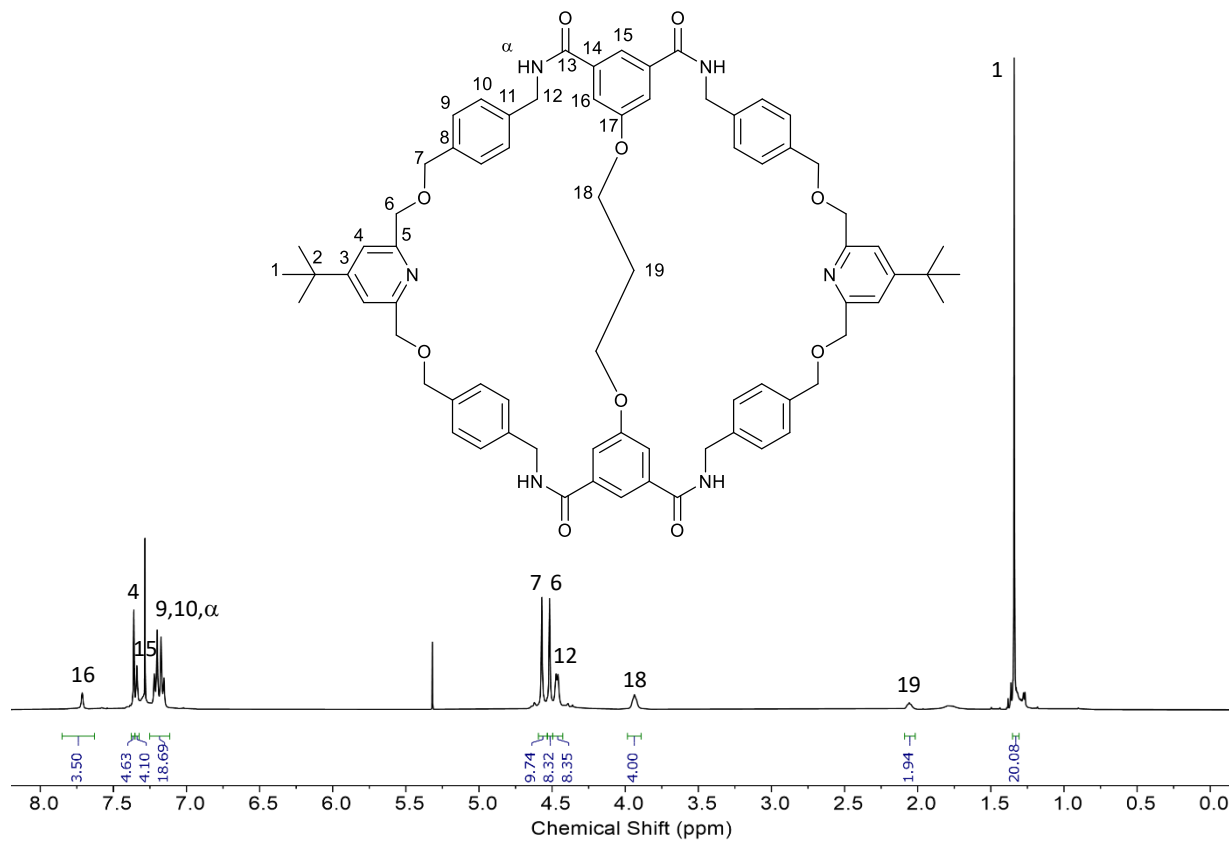

<sup>13</sup>C NMR (100 MHz, CDCl<sub>3</sub>)

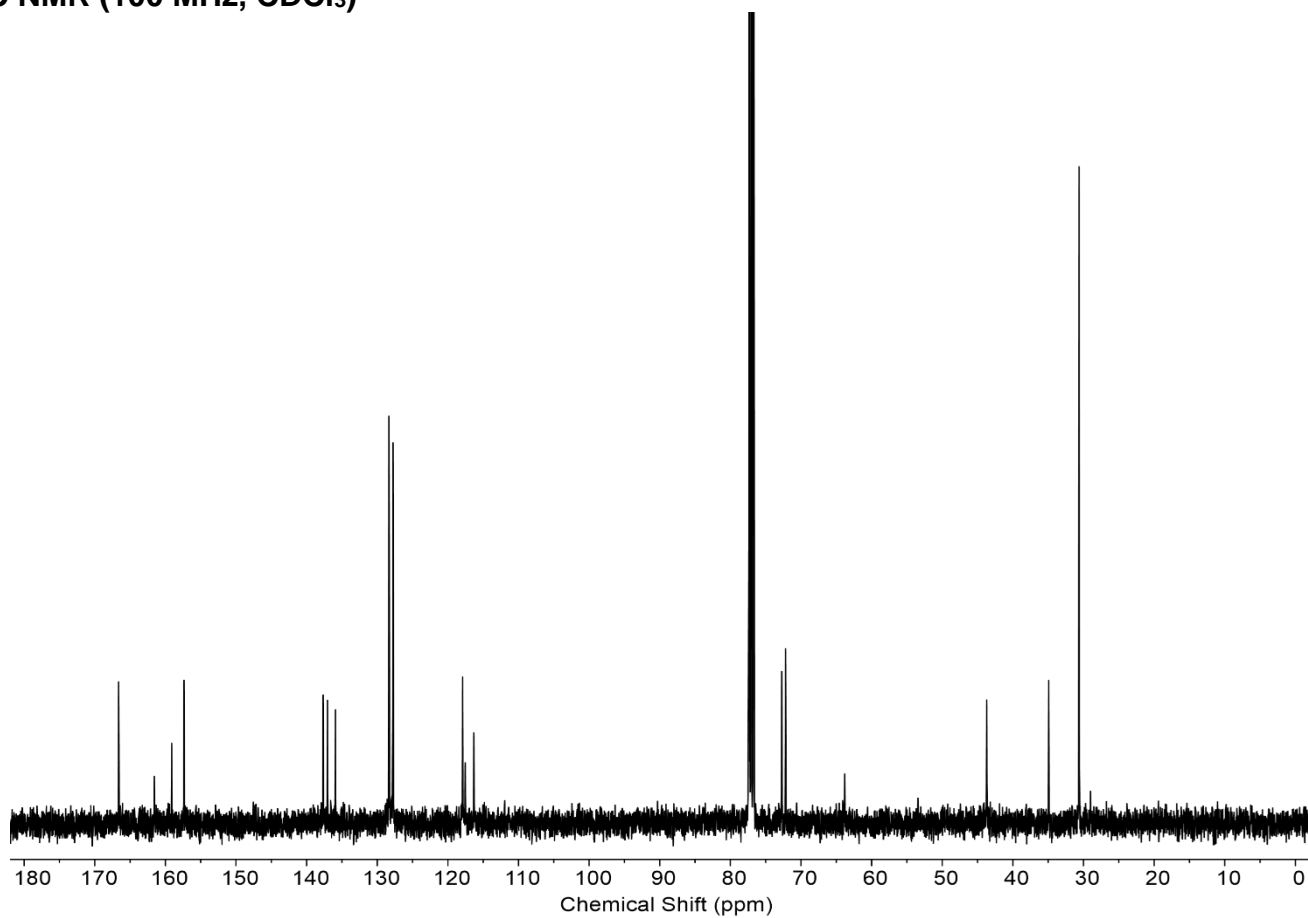

## IR Spectrum (neat)

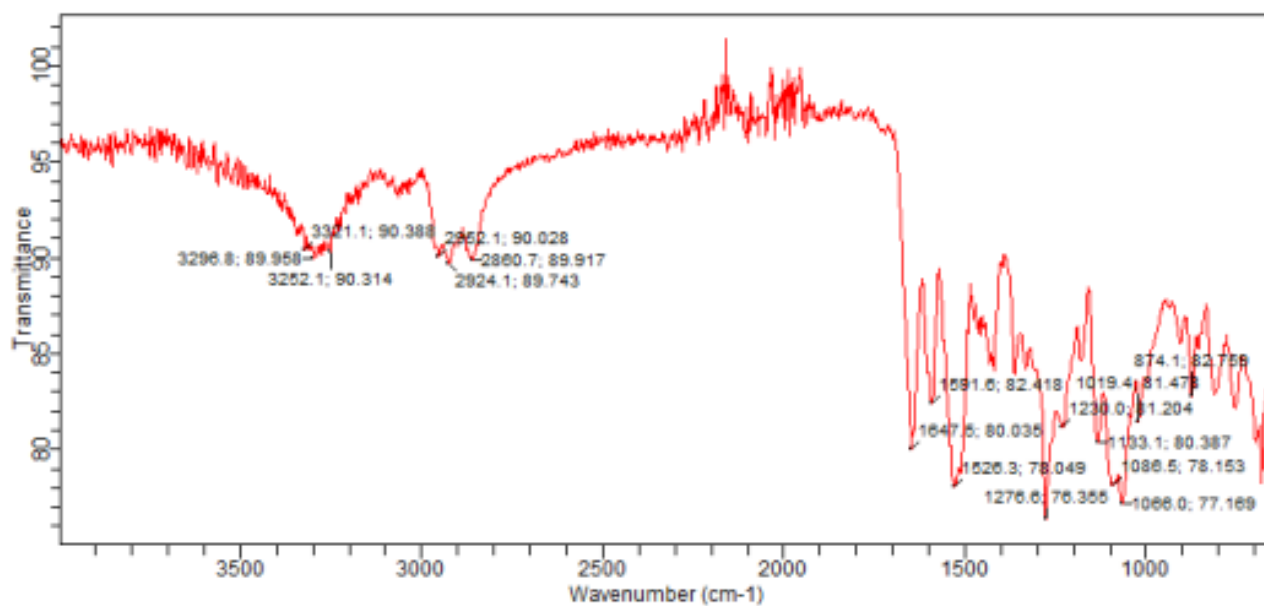

## HRMS (ES +ve)

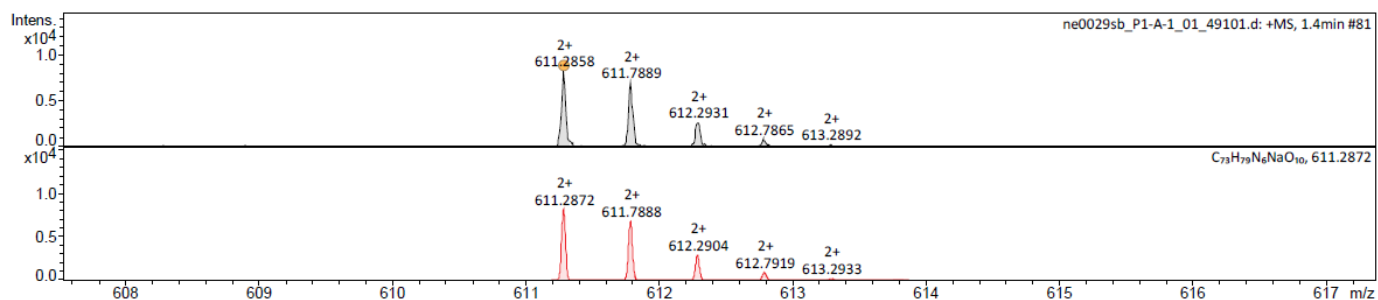

| Meas. m/z | # | Ion Formula                                                                    | m/z       | err [ppm] | err [mDa] | mSigma | Mean err [ppm] |
|-----------|---|--------------------------------------------------------------------------------|-----------|-----------|-----------|--------|----------------|
| 611.2858  | 1 | C <sub>73</sub> H <sub>79</sub> N <sub>6</sub> NaO <sub>10</sub>               | 611.2872  | 2.4       | 1.5       | 20.4   | 1.9            |
| 622.2761  | 1 | C <sub>73</sub> H <sub>78</sub> N <sub>6</sub> Na <sub>2</sub> O <sub>10</sub> | 622.2782  | 3.3       | 2.1       | 16.9   | 1.8            |
| 1199.5863 | 1 | C <sub>73</sub> H <sub>79</sub> N <sub>6</sub> O <sub>10</sub>                 | 1199.5852 | -0.9      | -1.1      | 51.9   | -2.7           |
| 1221.5740 | 1 | C <sub>73</sub> H <sub>78</sub> N <sub>6</sub> NaO <sub>10</sub>               | 1221.5672 | -5.6      | -6.8      | 181.0  | -1.9           |

NB: Depicted molecular ion peak corresponds to  $[M+H+Na]^{2+}$

## Stacked $^1\text{H}$ NMR Spectra of Handcuff Rotaxane HR1

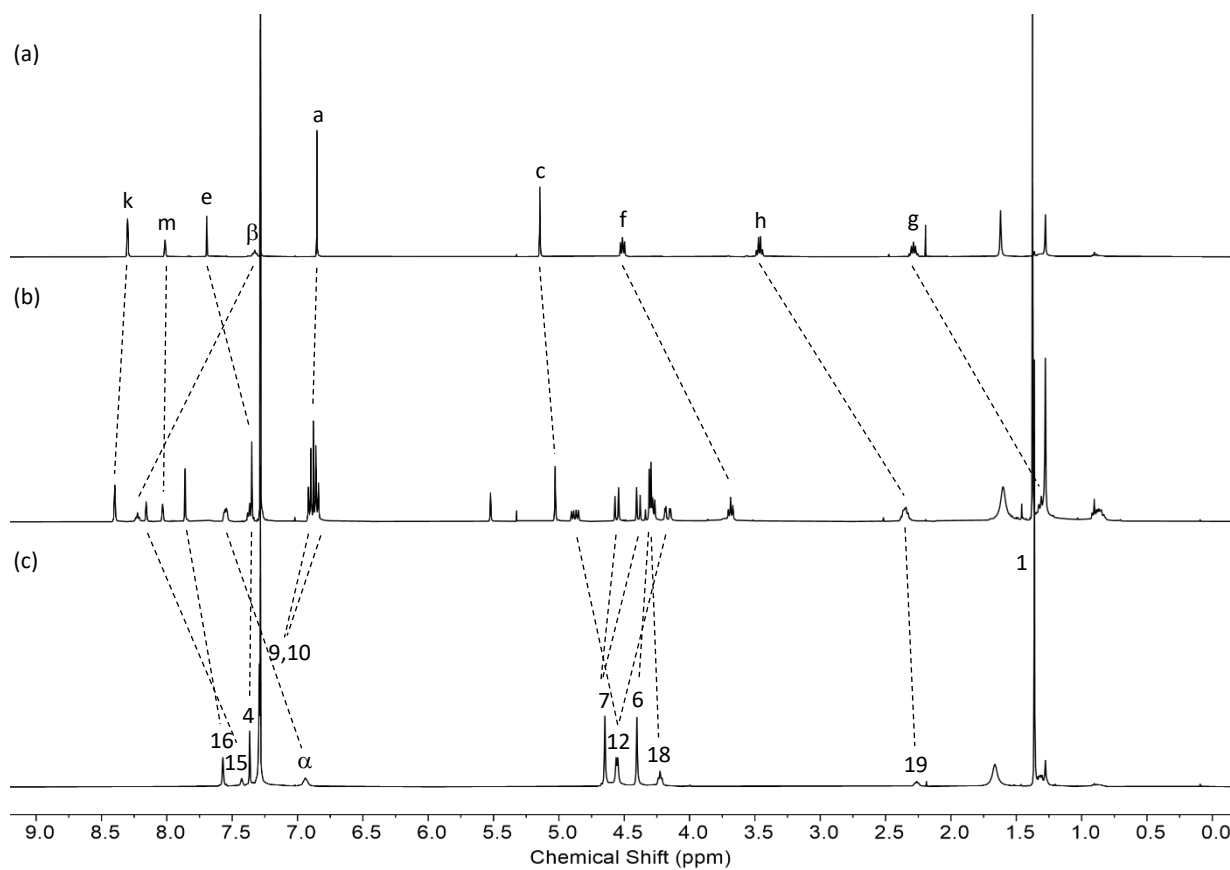

Stacked  $^1\text{H}$  NMR spectra of (a) axle **Ax**, (b) handcuff rotaxane **HR1** and (c) bis-macrocycle **BM1**.

### Part 3: Crystallographic Data

#### Bis-macrocycle **BM2**:

Single crystals of bis-macrocycle **BM2** were grown by slow evaporation of a chloroform solution. A suitable crystal was selected and studied using an Agilent SuperNova AtlasS2 diffractometer. Using Olex2<sup>1</sup> the structure was solved with the ShelXT<sup>2</sup> structure solution program using Intrinsic Phasing and refined with the ShelXL<sup>3</sup> refinement package using Least Squares minimisation.

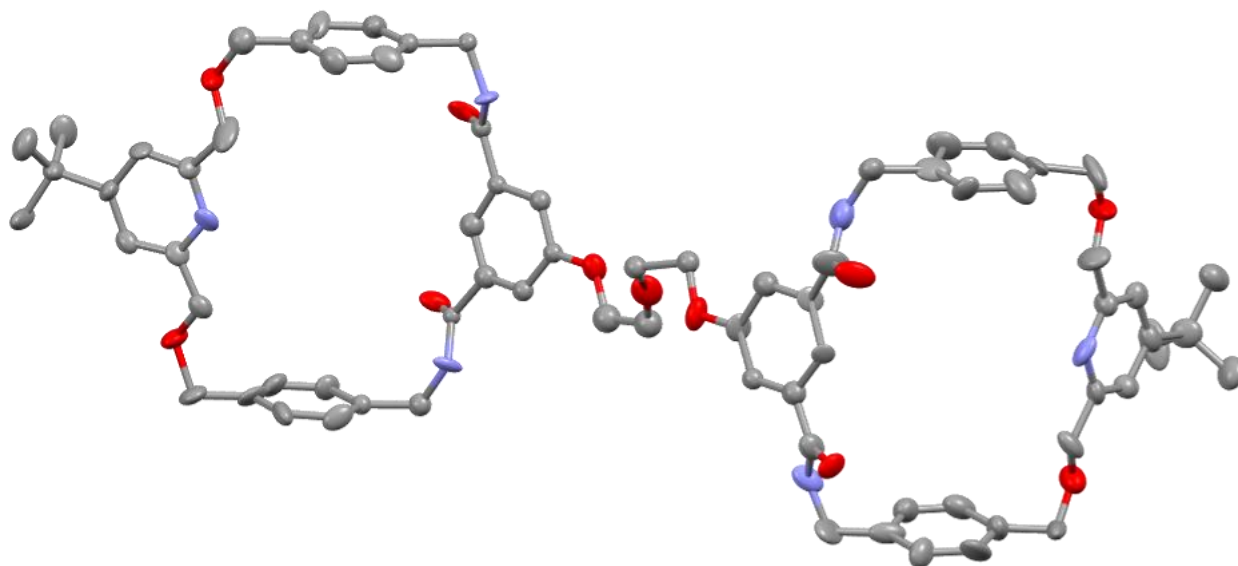

X-ray crystal structure of bis-macrocycle **BM2**. Thermal ellipsoids are displayed at 50% probability.



Crystal data and structural refinement for bis-macrocycle **BM2**:

|                                             |                                                                |
|---------------------------------------------|----------------------------------------------------------------|
| CCDC Number                                 | 2343052                                                        |
| Empirical formula                           | C <sub>74</sub> H <sub>80</sub> N <sub>6</sub> O <sub>11</sub> |
| Formula weight                              | 1229.44                                                        |
| Temperature/K                               | 100.01(10)                                                     |
| Crystal system                              | monoclinic                                                     |
| Space group                                 | Pc                                                             |
| a/Å                                         | 27.7031(18)                                                    |
| b/Å                                         | 13.0253(10)                                                    |
| c/Å                                         | 9.5007(5)                                                      |
| α/°                                         | 90                                                             |
| β/°                                         | 93.854(6)                                                      |
| γ/°                                         | 90                                                             |
| Volume/Å <sup>3</sup>                       | 3420.5(4)                                                      |
| Z                                           | 2                                                              |
| ρ <sub>calc</sub> /cm <sup>3</sup>          | 1.194                                                          |
| μ/mm <sup>-1</sup>                          | 0.648                                                          |
| F(000)                                      | 1308.0                                                         |
| Crystal size/mm <sup>3</sup>                | 0.17 × 0.08 × 0.03                                             |
| Radiation                                   | Cu Kα (λ = 1.54184)                                            |
| 2θ range for data collection/°              | 7.502 to 145.604                                               |
| Index ranges                                | -34 ≤ h ≤ 33, -16 ≤ k ≤ 16, -11 ≤ l ≤ 11                       |
| Reflections collected                       | 8629                                                           |
| Independent reflections                     | 8629 [R <sub>int</sub> = ?, R <sub>sigma</sub> = 0.0577]       |
| Data/restraints/parameters                  | 8629/187/828                                                   |
| Goodness-of-fit on F <sup>2</sup>           | 1.220                                                          |
| Final R indexes [ I  ≥ 2σ (I)]              | R <sub>1</sub> = 0.1052, wR <sub>2</sub> = 0.3054              |
| Final R indexes [all data]                  | R <sub>1</sub> = 0.1300, wR <sub>2</sub> = 0.3275              |
| Largest diff. peak/hole / e Å <sup>-3</sup> | 1.14/-0.44                                                     |

#### Part 4: References

- 1 O. V. Dolomanov, L. J. Bourhis, R. J. Gildea, J. A. K. Howard and H. Puschmann, *J. Appl. Cryst.*, 2009, **42**, 339-341.
- 2 G. M. Sheldrick, *Acta Cryst. A*, 2015, **71**, 3-8.
- 3 G. M. Sheldrick, *Acta Cryst. C*, 2015, **71**, 3-8.
